# Supplementary material for: Transcriptome and proteome profiling of neural stem cells from the human subventricular zone in Parkinson’s disease
Source: Acta Neuropathol Commun. 2019 Jun 3;7:4. doi: 10.1186/s40478-019-0736-0 (PMC6545684; doi:10.1186/s40478-019-0736-0)
Supplement: Supplementary file 1 — Table S1. Characteristics, diagnosis and pathological evaluation of PD patients and control donors. CNTR = control; PD = Parkinson’s disease; PDD = Parkinson’s disease and dementia; CAA = cerebral amyloid angiopathy; AG = argyrophilic grain; PMD = post-mortem delay; UNK = unknown; ND = not determined; NA = not applicable. (XLSX 13 kb) [file 40478_2019_736_MOESM1_ESM.xlsx]

## Sheet: Information donors
NBB number	Sex	Age	Diagnosis	Thal_phase	BraakNFT	CERAD	Braak_aSyn	McKeith_aSyn	CAA	ARTAG	TDP-43	Vascular_lesions_SVZ	AG score	PMD	pH_CSF	Brain_weight	Used for
2015-087	F	75	CNTR	1	2	0	0	none	N	Y	ND	N	N	09:10:00	6.57	1353	Proteomics NSC and RNAseq CD11b
2016-045	F	93	CNTR	0	3	0	0	none	N	Y	ND	N	N	10:00:00	6.38	1230	Proteomics NSC
2016-078	F	84	CNTR	3	3	A	0	none	N	Y	N	Y	N	07:40:00	7.5	1195	Proteomics NSC
2017-005	F	60	CNTR	1	0	0	0	none	type 2 stage 1	N	ND	N	N	05:30:00	7.07	1215	Proteomics SVZ
2016-137	M	77	CNTR	1	3	0	0	none	N	Y	N	N	Y (Nag score 1/3)	12:45:00	6.46	1716	RNAseq and Proteomics SVZ
2017-043	M	80	CNTR	0	2	0	0	none	N	Y	ND	N	N	09:30:00	UNK	1460	RNAseq and Proteomics SVZ
2018-105	M	87	CNTR	ND	3	0	0	ND	ND	ND	ND	ND	ND	06:45:00	6.39	1390	RNAseq NSC
2015-018	F	84	CNTR	1	2	0	0	none	type 2 stage 1	N	ND	Y	N	06:55:00	6.85	1165	RNAseq NSC and Proteomics NSC
2015-038	M	93	CNTR	1	0	0	0	none	N	Y	ND	Y	N	07:40:00	6.2	1185	RNAseq NSC and Proteomics NSC
2015-093	M	86	CNTR	1	1	0	0	none	type 2 stage 1	N	ND	N	N	11:45:00	UNK	1470	RNAseq NSC and Proteomics NSC
2016-116	F	81	CNTR	1	3	0	1	brainstem	N	Y	ND	N	N	05:15:00	UNK	1340	RNAseq SVZ and CD11b
2015-041	F	88	PD	0	2	0	6	limbic	N	Y	ND	Y	N	05:35:00	6.89	1152	Proteomics NSC
2015-088	F	86	PD	2	2	0	5	limbic	type 1 stage 1	Y	ND	N	N	03:00:00	6.97	1030	Proteomics NSC
2015-038	M	72	PD	3	1	0	6	limbic	type 2 stage 1	Y	ND	N	N	05:40:00	6	1584	Proteomics NSC
2016-023	M	75	PD	1	+	0	5	limbic	N	Y	ND	N	N	05:30:00	6.63	1360	Proteomics NSC
2016-127	M	91	PD	4	3	A	6	neocortical	type 1 stage 1	Y	ND	N	N	04:00:00	6.39	1360	Proteomics SVZ
2017-041	M	65	PD	0	+	0	6	limbic	N	N	ND	N	N	04:50:00	6.68	1420	Proteomics SVZ
2016-090	M	80	PD	1	1	0	5	limbic	N	Y	ND	N	N	09:15:00	6.78	1400	RNAseq CD11b, RNAseq and Proteomics SVZ
2016-098	F	73	PD	2	2	0	5	limbic	NA	Y	ND	N	N	06:10:00	6.29	1380	RNAseq NSC and SVZ
2015-058	M	70	PDD	3	1	0	6	neocortical	type 1 stage 1	Y	ND	N	N	08:00:00	6.6	1455	Proteomics NSC
2016-029	M	85	PDD	2	3	A	5	amygdala	type 2 stage 1	Y	ND	Y	N	05:15:00	6.39	1475	Proteomics NSC
2016-024	M	71	PDD	1	3	0	5	limbic	N	Y	ND	N	N	04:20:00	6.24	1500	Proteomics SVZ
2017-037	M	71	PDD	1	2	0	5	limbic	N	Y	ND	N	N	13:50:00	6.3	1310	Proteomics SVZ
2016-084	M	70	PDD	2	3	0	6	neocortical	N	Y	ND	N	N	04:30:00	6.34	1285	RNAseq NSC and CD11b
2016-016	F	66	PDD	3	+	0	6	neocortical	N	N	ND	N	N	07:10:00	6.65	1311	RNAseq NSC and CD11b, Proteomics NSC
2016-101	F	88	PDD	1	2	0	6	neocortical	N	Y	ND	N	N	06:05:00	6.58	960	RNAseq CD11b, NSC and SVZ, Proteomics SVZ
2016-102	M	78	PDD	3	2	0	6	neocortical	type 1 stage 1	Y	ND	N	N	05:10:00	6.2	1470	RNAseq NSC and SVZ, Proteomics SVZ
