# Supplementary material for: Transcriptome and proteome profiling of neural stem cells from the human subventricular zone in Parkinson’s disease
Source: Acta Neuropathol Commun. 2019 Jun 3;7:4. doi: 10.1186/s40478-019-0736-0 (PMC6545684; doi:10.1186/s40478-019-0736-0)
Supplement: Supplementary file 6 — Table S6. Genes differentially expressed in CD271+ NSCs in comparison to CD11b+ microglia cells from PD and control donors pooled together. (XLSX 120 kb) [file 40478_2019_736_MOESM6_ESM.xlsx]

## Sheet: DE genes CD271 vs CD11b
Upregulated genes in CD271	baseMean	log2FoldChange	lfcSE	stat	pvalue	padj				Downregulated genes in CD271	baseMean	log2FoldChange	lfcSE	stat	pvalue	padj
CXCR2	33.8121104987715	-2.75196086142519	0.762702723892809	-3.60816970389101	0.000308364770038472	0.00547406643811905				CXCR2	33.8121104987715	-2.75196086142519	0.762702723892809	-3.60816970389101	0.000308364770038472	0.00547406643811905
CD1D	15.5921684568154	-2.65756911052613	0.667481000553148	-3.98149027211827	6.84845244683436e-05	0.00183023742572446				CD1D	15.5921684568154	-2.65756911052613	0.667481000553148	-3.98149027211827	6.84845244683436e-05	0.00183023742572446
SYTL3	92.1776890941699	-2.41086164171093	0.582777377304042	-4.13684836714785	3.52108621160289e-05	0.00113412761376098				SYTL3	92.1776890941699	-2.41086164171093	0.582777377304042	-4.13684836714785	3.52108621160289e-05	0.00113412761376098
NCMAP	9.07676451746937	-2.37806811339529	0.60663802416803	-3.92007757287663	8.85204707434027e-05	0.00218484616425762				NCMAP	9.07676451746937	-2.37806811339529	0.60663802416803	-3.92007757287663	8.85204707434027e-05	0.00218484616425762
MS4A14	102.955522185417	-2.36388959106138	0.487235578921987	-4.8516358273579	1.22447306866018e-06	8.55412589369268e-05				MS4A14	102.955522185417	-2.36388959106138	0.487235578921987	-4.8516358273579	1.22447306866018e-06	8.55412589369268e-05
GPR82	15.2921110039613	-2.32993290942107	0.583437271776942	-3.99345914655902	6.51163022776467e-05	0.00175593532056155				GPR82	15.2921110039613	-2.32993290942107	0.583437271776942	-3.99345914655902	6.51163022776467e-05	0.00175593532056155
LRRK2	144.700373248207	-2.32917816178974	0.4749168145936	-4.90439186446343	9.37172320946835e-07	7.03917075895679e-05				LRRK2	144.700373248207	-2.32917816178974	0.4749168145936	-4.90439186446343	9.37172320946835e-07	7.03917075895679e-05
PRKAG2-AS1	38.3247720055016	-2.20783511655292	0.609788334766703	-3.62065817050699	0.000293854541544072	0.00527877647110599				PRKAG2-AS1	38.3247720055016	-2.20783511655292	0.609788334766703	-3.62065817050699	0.000293854541544072	0.00527877647110599
HLA-DRB6	43.9785815537679	-2.10624908629527	0.563976944589601	-3.73463686149078	0.000187986240105338	0.0038718683177558				HLA-DRB6	43.9785815537679	-2.10624908629527	0.563976944589601	-3.73463686149078	0.000187986240105338	0.0038718683177558
FAM26F	115.40005051782	-2.01813385099393	0.550541130191327	-3.66572766378522	0.000246636285345948	0.00465452932818751				FAM26F	115.40005051782	-2.01813385099393	0.550541130191327	-3.66572766378522	0.000246636285345948	0.00465452932818751
GPR155	92.1284216462355	-1.95965683691335	0.50889835427675	-3.85078242137063	0.000117741067439768	0.00272331873180887				GPR155	92.1284216462355	-1.95965683691335	0.50889835427675	-3.85078242137063	0.000117741067439768	0.00272331873180887
SRGAP1	263.849566163371	-1.86737997939452	0.550122039999746	-3.39448312122776	0.000687582782770125	0.00986354314127937				SRGAP1	263.849566163371	-1.86737997939452	0.550122039999746	-3.39448312122776	0.000687582782770125	0.00986354314127937
ADAM28	471.524653910206	-1.78010118397029	0.417294027409093	-4.26581994240998	1.99169365396695e-05	0.000737899351448225				ADAM28	471.524653910206	-1.78010118397029	0.417294027409093	-4.26581994240998	1.99169365396695e-05	0.000737899351448225
SLC2A13	31.511106130381	-1.77656522958402	0.436207006420727	-4.07275720800894	4.64598485278399e-05	0.00138406321823834				SLC2A13	31.511106130381	-1.77656522958402	0.436207006420727	-4.07275720800894	4.64598485278399e-05	0.00138406321823834
HK2	402.092500748603	-1.75595992374778	0.412731783007109	-4.25448195666951	2.09533554124726e-05	0.000760816971906985				HK2	402.092500748603	-1.75595992374778	0.412731783007109	-4.25448195666951	2.09533554124726e-05	0.000760816971906985
UBXN2B	82.764314723223	-1.68234951620872	0.450638157421934	-3.73326024106195	0.000189017117817844	0.0038797224904673				UBXN2B	82.764314723223	-1.68234951620872	0.450638157421934	-3.73326024106195	0.000189017117817844	0.0038797224904673
MAP3K1	124.901748735306	-1.54080876538802	0.302757207877007	-5.08925543405712	3.59472134883493e-07	3.6391984095917e-05				MAP3K1	124.901748735306	-1.54080876538802	0.302757207877007	-5.08925543405712	3.59472134883493e-07	3.6391984095917e-05
IRAK3	136.350097533389	-1.50817422081668	0.349187331888275	-4.3190977538075	1.56668380561942e-05	0.00062804042758153				IRAK3	136.350097533389	-1.50817422081668	0.349187331888275	-4.3190977538075	1.56668380561942e-05	0.00062804042758153
FCHO2	61.3482986411374	-1.48935352671785	0.304280469086025	-4.89467342807593	9.84691072437427e-07	7.21663776155675e-05				FCHO2	61.3482986411374	-1.48935352671785	0.304280469086025	-4.89467342807593	9.84691072437427e-07	7.21663776155675e-05
ZNF292	471.748682540326	-1.47399633650476	0.41598357642081	-3.54340031687612	0.000395002608121819	0.00656286669905876				ZNF292	471.748682540326	-1.47399633650476	0.41598357642081	-3.54340031687612	0.000395002608121819	0.00656286669905876
GPRIN3	123.123594430503	-1.45247586732608	0.404043164072347	-3.59485321490553	0.000324574521737601	0.00564391155265994				GPRIN3	123.123594430503	-1.45247586732608	0.404043164072347	-3.59485321490553	0.000324574521737601	0.00564391155265994
PLEKHA2	253.370729570574	-1.41850332879323	0.36151278219902	-3.923798545005	8.71636312234223e-05	0.00216477492431393				PLEKHA2	253.370729570574	-1.41850332879323	0.36151278219902	-3.923798545005	8.71636312234223e-05	0.00216477492431393
SKAP2	390.074946548911	-1.38544067976248	0.379049393896364	-3.65503995540296	0.000257141927387287	0.00479222693380427				SKAP2	390.074946548911	-1.38544067976248	0.379049393896364	-3.65503995540296	0.000257141927387287	0.00479222693380427
ABCB10	17.4292429055158	-1.38459084239969	0.374660237638574	-3.69559057327928	0.000219376254861907	0.00426819013123834				ABCB10	17.4292429055158	-1.38459084239969	0.374660237638574	-3.69559057327928	0.000219376254861907	0.00426819013123834
SLC25A30	62.8370922006501	-1.36255731737986	0.316486876768594	-4.30525692342094	1.66792045074527e-05	0.000657086278898815				SLC25A30	62.8370922006501	-1.36255731737986	0.316486876768594	-4.30525692342094	1.66792045074527e-05	0.000657086278898815
HERC3	53.1793916196547	-1.34723667255783	0.349844048712393	-3.85096352936788	0.000117654020619994	0.00272331873180887				HERC3	53.1793916196547	-1.34723667255783	0.349844048712393	-3.85096352936788	0.000117654020619994	0.00272331873180887
PTPRC	1757.13239089133	-1.33777422005658	0.371784343008664	-3.59825324872652	0.00032036159547915	0.00559508716314901				PTPRC	1757.13239089133	-1.33777422005658	0.371784343008664	-3.59825324872652	0.00032036159547915	0.00559508716314901
BNIP3L	497.490387725871	-1.33072062017285	0.387980808393895	-3.42986197096081	0.000603888361905925	0.0089726994668261				BNIP3L	497.490387725871	-1.33072062017285	0.387980808393895	-3.42986197096081	0.000603888361905925	0.0089726994668261
TBC1D9	91.8424363317723	-1.32698061382754	0.360835989761342	-3.67751735270422	0.000235515058447738	0.00452850655050304				TBC1D9	91.8424363317723	-1.32698061382754	0.360835989761342	-3.67751735270422	0.000235515058447738	0.00452850655050304
ARHGAP15	63.564715119368	-1.32599789671602	0.336262035836919	-3.94334701928441	8.03522550273548e-05	0.00205543477207019				ARHGAP15	63.564715119368	-1.32599789671602	0.336262035836919	-3.94334701928441	8.03522550273548e-05	0.00205543477207019
PTER	25.3485057874726	-1.30943035239654	0.335350788625165	-3.90465863451464	9.43584812377959e-05	0.00230042125891165				PTER	25.3485057874726	-1.30943035239654	0.335350788625165	-3.90465863451464	9.43584812377959e-05	0.00230042125891165
NSA2	289.554989434108	-1.28988385149486	0.306130508716898	-4.21350964626565	2.51432843671619e-05	0.0008706135508699				NSA2	289.554989434108	-1.28988385149486	0.306130508716898	-4.21350964626565	2.51432843671619e-05	0.0008706135508699
APPL1	262.339616150387	-1.27296112566385	0.372180243258973	-3.42028129843017	0.000625564128878819	0.00915954760213415				APPL1	262.339616150387	-1.27296112566385	0.372180243258973	-3.42028129843017	0.000625564128878819	0.00915954760213415
RPL23	2150.34994611456	-1.26566035347442	0.343034354274765	-3.68960233195959	0.000224604869159262	0.00436281262923016				RPL23	2150.34994611456	-1.26566035347442	0.343034354274765	-3.68960233195959	0.000224604869159262	0.00436281262923016
KIAA0146	40.6629646903472	-1.24842460077098	0.327596729649535	-3.81085794753371	0.00013848533192682	0.00306368067853151				KIAA0146	40.6629646903472	-1.24842460077098	0.327596729649535	-3.81085794753371	0.00013848533192682	0.00306368067853151
SAMD9	143.373541698705	-1.22506541096664	0.36135947862285	-3.39015712452153	0.000698525747704278	0.0099813521716661				SAMD9	143.373541698705	-1.22506541096664	0.36135947862285	-3.39015712452153	0.000698525747704278	0.0099813521716661
MED13L	242.81975052598	-1.22334387978386	0.298834421957009	-4.09371809235501	4.24510402222974e-05	0.00130204362337166				MED13L	242.81975052598	-1.22334387978386	0.298834421957009	-4.09371809235501	4.24510402222974e-05	0.00130204362337166
KIAA1147	168.83045761362	-1.20831294216033	0.339524271534989	-3.5588411299656	0.000372494755130822	0.00625854056932883				KIAA1147	168.83045761362	-1.20831294216033	0.339524271534989	-3.5588411299656	0.000372494755130822	0.00625854056932883
CTBS	87.9644374797333	-1.20481952338742	0.251791986774729	-4.78497961281562	1.7100468943719e-06	0.00010751694842193				CTBS	87.9644374797333	-1.20481952338742	0.251791986774729	-4.78497961281562	1.7100468943719e-06	0.00010751694842193
CELF2	659.438912826966	-1.19723960398572	0.249526640764987	-4.79804320819324	1.60223220383938e-06	0.000103521949664139				CELF2	659.438912826966	-1.19723960398572	0.249526640764987	-4.79804320819324	1.60223220383938e-06	0.000103521949664139
EIF2S3	302.314174576067	-1.19631395468632	0.245100493688181	-4.8809120564575	1.05596327469961e-06	7.59911884310937e-05				EIF2S3	302.314174576067	-1.19631395468632	0.245100493688181	-4.8809120564575	1.05596327469961e-06	7.59911884310937e-05
LOC100507577	55.9414103904501	-1.16880378866275	0.303245715408605	-3.85431262264615	0.000116055226021407	0.00270252578957453				LOC100507577	55.9414103904501	-1.16880378866275	0.303245715408605	-3.85431262264615	0.000116055226021407	0.00270252578957453
APOOL	48.9386082594866	-1.13544515123841	0.274235231896218	-4.14040582381519	3.46691923854952e-05	0.00112237987056132				APOOL	48.9386082594866	-1.13544515123841	0.274235231896218	-4.14040582381519	3.46691923854952e-05	0.00112237987056132
CD2AP	156.372810983268	-1.13245191556645	0.239012045769149	-4.73805373248942	2.15780603993236e-06	0.000129533421874533				CD2AP	156.372810983268	-1.13245191556645	0.239012045769149	-4.73805373248942	2.15780603993236e-06	0.000129533421874533
ZNF217	345.564765091944	-1.13092006914822	0.261089114295466	-4.3315481466929	1.48064560832573e-05	0.000601625593097251				ZNF217	345.564765091944	-1.13092006914822	0.261089114295466	-4.3315481466929	1.48064560832573e-05	0.000601625593097251
PAN3	57.4495898472373	-1.11336194365977	0.283566829965594	-3.92627707477231	8.62707732385025e-05	0.00215604739980575				PAN3	57.4495898472373	-1.11336194365977	0.283566829965594	-3.92627707477231	8.62707732385025e-05	0.00215604739980575
KDM1A	31.6113141884611	-1.10731109938653	0.288243620997794	-3.84158058920238	0.000122244586551044	0.0027975743887716				KDM1A	31.6113141884611	-1.10731109938653	0.288243620997794	-3.84158058920238	0.000122244586551044	0.0027975743887716
FAM135A	58.476088333031	-1.10100658271022	0.297525278557889	-3.70054802753846	0.000215134356118385	0.00421153743281705				FAM135A	58.476088333031	-1.10100658271022	0.297525278557889	-3.70054802753846	0.000215134356118385	0.00421153743281705
C1D	98.4270857793917	-1.10074410029193	0.31564872732799	-3.48724390435496	0.000488026065396676	0.00762541724810245				C1D	98.4270857793917	-1.10074410029193	0.31564872732799	-3.48724390435496	0.000488026065396676	0.00762541724810245
ELK4	52.2803506342165	-1.07027575568387	0.239865524116912	-4.46198243630133	8.12048832757329e-06	0.000371675684142492				ELK4	52.2803506342165	-1.07027575568387	0.239865524116912	-4.46198243630133	8.12048832757329e-06	0.000371675684142492
USP6NL	40.5819896330801	-1.04213509610787	0.298855739356163	-3.48708409734069	0.000488317779574617	0.00762541724810245				USP6NL	40.5819896330801	-1.04213509610787	0.298855739356163	-3.48708409734069	0.000488317779574617	0.00762541724810245
UHMK1	135.528498841185	-1.03426145155603	0.304556921236025	-3.3959545143763	0.000683897235093969	0.00984317634991874				UHMK1	135.528498841185	-1.03426145155603	0.304556921236025	-3.3959545143763	0.000683897235093969	0.00984317634991874
DOCK4	773.647814974792	-1.00178836621565	0.294965913390068	-3.39628520021859	0.000683071463892367	0.00984315043143331				DOCK4	773.647814974792	-1.00178836621565	0.294965913390068	-3.39628520021859	0.000683071463892367	0.00984315043143331
GPD2	97.5851708020981	-1.00020001252529	0.283622834248906	-3.52651441190917	0.000421068247890039	0.00684364801264544				GPD2	97.5851708020981	-1.00020001252529	0.283622834248906	-3.52651441190917	0.000421068247890039	0.00684364801264544
PLS1	16.9378261563065	-1.6380410936878	0.445784929070383	-3.67450980701319	0.000238306491447129	0.00456219446606956				PLS1	16.9378261563065	-1.6380410936878	0.445784929070383	-3.67450980701319	0.000238306491447129	0.00456219446606956
PDE3B	98.656968616855	-1.4544031700437	0.298617534360425	-4.87045468766165	1.11341733462236e-06	7.96460088586747e-05				PDE3B	98.656968616855	-1.4544031700437	0.298617534360425	-4.87045468766165	1.11341733462236e-06	7.96460088586747e-05
LPP	135.785204217047	-1.1996312920521	0.333318512405574	-3.59905390010987	0.000319376994859427	0.0055860579510845				LPP	135.785204217047	-1.1996312920521	0.333318512405574	-3.59905390010987	0.000319376994859427	0.0055860579510845
ATP6V0B	272.445099661371	1.238161777943	0.35088324102147	3.52870024324485	0.000417605869648572	0.00680589320439542				PDCD6IP	139.785250887383	-0.709321485204397	0.19795446095705	-3.58325587498782	0.000339337904835295	0.00585799221266248
PMP2	36.5612212615274	1.817579171246	0.523889339561989	3.46939522145198	0.000521631489018468	0.0080198323910098				POLK	92.4237628015705	-0.772939556795601	0.202335804996105	-3.82008293989529	0.000133406806200224	0.00297883683526705
PRAF2	46.9403599067467	2.021382454912	0.531393225074837	3.80392966927143	0.00014241863066901	0.00312171185682935				VHL	175.818204189783	-0.780624373817518	0.227996040877569	-3.42385056693464	0.000617405609841599	0.00909436179428822
C12orf49	68.7651722250123	2.108742166906	0.606616622333971	3.47623538371331	0.000508505766194131	0.00788025503118328				HP1BP3	513.465068795191	-0.794933456397111	0.188477912561368	-4.2176478166283	2.46863988271512e-05	0.000859777610463988
CDK18	30.4423087873968	2.242191943548	0.569123837810596	3.93972593411946	8.15747461973986e-05	0.00207780792766338				VPS36	112.287905888544	-0.882941053926159	0.245840608372286	-3.59151834097761	0.000328757034914252	0.00570833072541519
CLDN11	325.567368522941	4.218351302225	0.836149724960947	5.04497122500641	4.53589625488189e-07	4.30046163974755e-05				PHC3	95.9978886808478	-0.887919456631416	0.238948202387329	-3.71594951441451	0.00020244200510542	0.00404010774271601
PRDX1	351.031057795692	1.0159760517994	0.288624643973153	3.52005995681335	0.000431449256601659	0.00695559084934334				SCAF8	89.5278040550354	-0.889837205865143	0.253163087348271	-3.51487736694021	0.000439957101498827	0.00706232569720749
RBM42	36.7334539039309	1.0327097548986	0.274880430349109	3.75694171311873	0.0001720025385084	0.00359849794224404				SP100	328.204052626311	-0.903384179456613	0.231231496450201	-3.90683878850895	9.35114978820937e-05	0.0022891154788924
ATG13	49.5983662693911	1.0699368532431	0.315632296948506	3.38982057155466	0.000699383836274517	0.0099813521716661				FLJ10038	44.5904682412865	-0.921049760925529	0.271631786063509	-3.39080257974736	0.000696882806816784	0.00997001438351294
C16orf80	138.507796662039	1.3516405002663	0.390044948436096	3.46534548309309	0.000529550728332636	0.00811550594235424				HELZ	115.08229631706	-0.926883044370537	0.254440134421998	-3.64283349588737	0.000269653275026184	0.00496344841827857
VPS28	64.4193363228887	1.3773478110852	0.39267831002345	3.50757293165224	0.000452214378775179	0.00721248727483083				KANSL1	37.9835087559616	-0.959869014154896	0.242351343227747	-3.96065068743139	7.47458072031062e-05	0.00194959260447229
ACTN4	200.626775116371	1.4479960834138	0.336480154069985	4.30336251900499	1.68225252731326e-05	0.000657086278898815				FOXN3	364.386968792494	-0.976759142936915	0.26771816762154	-3.64846043738694	0.000263816518329564	0.00488394395449639
R3HCC1	22.656262046306	1.6032835361686	0.406939372766469	3.93985847392723	8.15296920218022e-05	0.00207780792766338				KLHL5	352.897286502948	-0.984139614833223	0.27458676084311	-3.58407525479908	0.000338274551685101	0.0058480865331841
USP31	28.2572140500538	1.7580256305592	0.439778963627425	3.9975209729417	6.40093212393468e-05	0.00172998948308877
IP6K1	31.7845848036409	1.7724645719063	0.508523731118649	3.48551004297722	0.000491199784293585	0.00765042062994938
ARHGEF10	18.8579145528238	1.8937449408619	0.531898232892799	3.56035200674107	0.000370357993769836	0.00623140365292178
SLC44A1	104.636958027932	1.8952922740745	0.524133918673696	3.61604583590102	0.00029913743096304	0.00535756484300522
MBP	1666.20261449663	1.9256007971813	0.531112891425661	3.62559604232619	0.000288295722605505	0.00521025824848013
PRDX5	161.685780267016	2.0989690436306	0.516341288764713	4.0650807698376	4.80158306121473e-05	0.00141628916664867
HSPBP1	42.401301006968	2.1739780671462	0.548689199329549	3.96213023657586	7.42839984927603e-05	0.00194178697154161
RRP12	43.2291418197822	2.1872616495534	0.563558170045639	3.88116394333572	0.000103957729527134	0.00247906543185525
CAPN2	87.1235691813131	2.2458871091464	0.557814221375394	4.02622777097498	5.66787888914168e-05	0.00159979716974694
AGPAT4	63.4461091202964	2.4424623076042	0.448719147982021	5.44318716637888	5.23356056705653e-08	7.91393854861485e-06
SGTA	19.863966784197	2.5047948325281	0.554138403154014	4.52016106133675	6.1792602102977e-06	0.000296455592257897
LMF1	27.3096114512753	2.5102219903073	0.731302682850864	3.43253491224948	0.000597966888921374	0.00889578138861112
SLAIN1	42.061797283401	2.7090892003665	0.661913359585839	4.09281541327642	4.26166965292416e-05	0.00130204362337166
ATL1	22.6144718130838	2.8858915432379	0.723967826503324	3.9862151846946	6.71356297405569e-05	0.00179821128448586
FLNB	49.8031826916204	3.2243901022038	0.840258821266648	3.83737727066429	0.000124355348840924	0.00282961713762606
SPSB1	78.6554107250669	3.2911480799461	0.671421029086669	4.90176496917744	9.49794297914708e-07	7.04735570365782e-05
AGT	104.909132551707	3.3041085654055	0.8709674271824	3.79360750159667	0.000148474306289162	0.00322860529370586
TNFRSF12A	81.0326729104895	3.5279481770802	0.81908999760431	4.30715573062644	1.65367188595977e-05	0.000654131269856802
DNAJC6	31.075443148874	3.6140488345735	0.883845433140013	4.08900549696112	4.33226587827889e-05	0.00131353421781522
OSCP1	24.736618212476	3.6862398580494	1.0059342472984	3.66449384534763	0.000247828198936377	0.00466229238502985
ST3GAL4	6.53529926466036	3.6862569933798	0.974715901228433	3.78187837987871	0.000155649407907992	0.00333821871969276
SLC13A3	7.28754686589546	3.7550035361597	1.06947254053984	3.51107989576269	0.000446290244731742	0.00714354801281742
FANK1	12.6275346274578	3.7964873129237	0.94821495592446	4.00382559798619	6.23263195695609e-05	0.00169988633236981
SHC4	12.648743818261	3.8469689726033	0.930870547771759	4.1326573085934	3.58593178944277e-05	0.00115154680528719
ANK3	54.1726076079492	3.9167934156331	0.713936667917997	5.48619169128177	4.10691230285829e-08	6.54148991599269e-06
PCSK6	17.5164602280266	3.9933102440023	0.90596174015878	4.40781334022166	1.04419473883397e-05	0.000450323117332512
HBB	770.597555233404	4.1620102561012	0.89713110069585	4.63924420062239	3.49685661110462e-06	0.00018483827024892
CTGF	75.9603759230734	4.1641902873622	0.917031199818558	4.54094723078792	5.60020484674666e-06	0.000276446475616676
KIF21A	49.4856023471954	4.1790333391461	0.666585711646196	6.26931130705695	3.62648458848851e-10	1.80508270392016e-07
PHF21B	5.68282941952555	4.1833009605693	1.22578721432707	3.41274644707877	0.000643117477840697	0.00935771180302676
ZFHX4	16.7840359880484	4.2594155181604	0.936496143944299	4.54824672338826	5.40946950263201e-06	0.000269256344493508
SH3GL3	49.8833684324583	4.3107600665008	0.786817251227172	5.4787310011028	4.28387049505538e-08	6.73356801762257e-06
COBL	27.0168273988957	4.3624395107896	0.717324531614376	6.08154234035702	1.19031923035632e-09	4.88609847705502e-07
NDN	19.37489634513	4.4110848681551	0.943771353627913	4.67389145813616	2.95545568857606e-06	0.000161214034957669
EFHD1	109.577061710503	4.5449916380756	0.849133906785305	5.35250282877322	8.67459466733674e-08	1.17757622609096e-05
ANKS1B	112.553029377406	4.6353668481629	0.786491323680721	5.89372915961708	3.77575854736855e-09	1.10012711236255e-06
MEGF10	16.3733999624609	4.6955750462588	0.941044290041621	4.98974925617063	6.04577174129363e-07	5.21598583223174e-05
NTM	12.6254817288517	4.7757957621377	1.04230863378146	4.58194013495913	4.6068178954943e-06	0.000235183959741773
RCAN2	13.5321976160227	4.8068996098924	1.02660427621478	4.68232961937005	2.83632912591104e-06	0.000158330783823053
CD200	9.03317522519221	4.8778798997981	1.2760821966188	3.82254365175134	0.000132082087167443	0.00297054346245004
FBLN1	16.5855250296827	4.8990647941275	1.38754453510145	3.53074418167723	0.000414392323575198	0.00679346819997425
CALD1	82.1785052590579	5.0114908059359	0.825570965554051	6.07033315733509	1.27645166947083e-09	4.88609847705502e-07
SYNJ2	73.4243641697228	5.0595393277059	0.710915621730979	7.11693367405071	1.10354556740192e-12	1.88327933545477e-09
GJB1	22.8706528075055	5.0816760078396	0.984722176012098	5.16051748567219	2.46268158489682e-07	2.77539568048844e-05
GPRC5B	83.2021317499585	5.1011295289321	0.786051480685734	6.48956163085143	8.60864861323959e-11	5.71327312965334e-08
TMEM151A	4.64464633475302	5.3002801639492	1.48480469473121	3.56968171151204	0.000357415225961066	0.00608216850332036
ADAMTS18	9.56049553828263	5.3215817878751	1.24269077752148	4.28230569030927	1.84966633757431e-05	0.000701463938687705
FAIM2	37.6261754947872	5.4031743509174	1.03503053203847	5.22030431341572	1.78629364829208e-07	2.20444024850545e-05
HKDC1	7.21266608637354	5.4235326576065	1.32439141330476	4.09511312375028	4.21962303117165e-05	0.00129916537964888
C9orf135	6.07156095861062	5.6686840663789	1.36615154357465	4.14938159169834	3.33374677717995e-05	0.00108927781889897
EDIL3	15.3377663861174	5.6932418348355	1.26747771976548	4.49178849146863	7.06275470879903e-06	0.000330869285299268
DNAI2	8.67659712776887	5.6939254338373	1.53512363597594	3.70909892884129	0.00020799815280244	0.00412748493916602
LRRN3	6.22891478663876	5.7020603549979	1.48308648044926	3.84472546285407	0.000120687477818525	0.00277256271157712
CCDC60	39.7429282065223	5.7915112778037	1.67587481809088	3.45581377277407	0.000548634225948711	0.00832780745004232
ZNF827	9.80108860366641	5.8680266416351	1.46274476419925	4.0116545177637	6.02946929817562e-05	0.00166731574620384
SEMA3B	19.8673187185793	5.9022807742415	1.18927174954382	4.96293700452019	6.94351081028445e-07	5.64266531562299e-05
PPP2R1A	181.985619088866	1.03264098826496	0.293274923935747	3.52106813090915	0.000429812167569571	0.00693856236998121
PDAP1	176.260473046516	1.04122895052134	0.306144897919867	3.40109849158381	0.000671156416292902	0.00971834490792122
HAX1	64.6221086821316	1.06161099636568	0.297501739449194	3.56841945976916	0.000359141216114304	0.00609417751093959
PHF5A	42.0105852634674	1.07195573924251	0.315790464818992	3.39451585359599	0.000687500594303458	0.00986354314127937
MRPL47	126.407761014486	1.08396293328921	0.312627679026287	3.46726475616403	0.000525783737363728	0.00807328088245127
PSENEN	176.645033503615	1.09531423476898	0.316673827766271	3.45880883966641	0.000542569836604356	0.00825673792111546
NUDT16L1	47.1426768317281	1.09739040616322	0.312572185576858	3.51083831767681	0.00044669599577889	0.00714354801281742
NDUFAF3	76.3392684906379	1.10003574995781	0.238574819337751	4.61086275999851	4.01001217884604e-06	0.00020737491553461
FXR2	59.9118302247421	1.11506567469221	0.3039238580591	3.66889813064749	0.000243598113252402	0.00461176396341236
POLR2E	81.3778367522039	1.12104399968172	0.312487108935852	3.5874887879354	0.000333878084982077	0.00578044580173318
POLR2J	59.2251712288279	1.12177950377709	0.259634964188466	4.32060260944978	1.55603678650326e-05	0.000625872574126865
RNH1	150.53158700612	1.12189630041172	0.280532906922454	3.99916114198269	6.35673898733006e-05	0.00172585463506011
PSEN1	57.9379056894326	1.12274889134016	0.234455047513568	4.78875973559572	1.67815256904926e-06	0.00010606989730086
DYNLRB1	144.126958165627	1.12673781527212	0.291553859534555	3.86459578024753	0.000111273320298085	0.00261305876357659
PSPC1	112.802529755531	1.13083087758144	0.330033183522567	3.42641568799737	0.000611603601789468	0.00904234731061508
FBXO7	96.9186414394469	1.13345628621313	0.23087630548853	4.90936600797885	9.13713050454463e-07	6.99693339790321e-05
CLPTM1	79.7615344591714	1.14187526178017	0.282826307307365	4.03737287613498	5.40531182187649e-05	0.00154719514481325
UBE2J2	40.8790936168474	1.15815184729807	0.33358409902291	3.47184368406758	0.00051689722009574	0.00797584867577993
PHB	92.838988841423	1.17767027161127	0.274564292061187	4.28923318021567	1.79291061128256e-05	0.000686477889819918
MLF2	171.425899679775	1.18237227223421	0.333854524442008	3.54157929778064	0.000397739286164155	0.00658087744115928
UQCRC1	29.9625024429373	1.18721713385214	0.339670810234428	3.49519916955114	0.000473708122225855	0.00748534024882283
ATP5G1	93.6218251773764	1.18986194615842	0.301270112853869	3.94948551280811	7.83193506597466e-05	0.00202950751189009
FAM108B1	64.2170097134906	1.20744808551168	0.327381035871169	3.68820412061632	0.000225842445935238	0.0043797302908155
PQBP1	55.2898125006925	1.21101087234526	0.320966321836329	3.77301539119981	0.000161286334011096	0.00341484614848905
PPM1G	139.631275389869	1.24752164293204	0.362901134498861	3.43763500396541	0.000586818111769829	0.00875172180175078
PRMT1	55.9763569986309	1.25029785326777	0.363050058796994	3.44387178289069	0.000573447577014491	0.00859223985774546
MAP7D1	87.5897778990859	1.25103957851097	0.340796834084467	3.6709248836534	0.000241674364354683	0.0045862125507934
CDK2AP2	234.85096425794	1.25471337988006	0.362212334527351	3.46402720248976	0.0005321526943257	0.00812796125629162
HABP4	54.2210509068928	1.27962252245788	0.2407770659835	5.31455318317389	1.06919352716665e-07	1.40358086544317e-05
YWHAQ	375.598077729749	1.28139640387902	0.234298113445822	5.46908545285971	4.52363627139568e-08	7.01809855819387e-06
NDUFA13	36.1705057985414	1.28936316170033	0.356500860891644	3.6167182274834	0.000298361785500998	0.00535169653092331
VAMP2	188.138926952031	1.29698556926542	0.33520938155333	3.86918040078505	0.000109201822884035	0.00258321777459938
POLR2C	26.6345845996651	1.30417375632807	0.369969569849925	3.52508385178028	0.000423348762692729	0.00685772611088448
YIPF3	78.1961445042687	1.30822094757671	0.316736177159722	4.13031741213765	3.6226271580997e-05	0.00115620072951389
HDGF	210.171164605422	1.32638537082584	0.374780520458202	3.5390990150828	0.000401495226800686	0.00663383399634993
GUCD1	52.6014009220233	1.32908129183283	0.360406653047933	3.68772685130225	0.00022626634707386	0.00438083919310265
SAP30BP	96.6286552043682	1.32935913294705	0.372916227477217	3.56476611902942	0.000364180784304374	0.00615347050820376
AP2S1	276.942922689465	1.33547447616867	0.342966807692837	3.89388840614784	9.86500454285448e-05	0.0023799276089449
GADD45GIP1	43.8824397182101	1.33867529416063	0.367585630098628	3.64180529527621	0.000270732809032068	0.00497565251799552
PITHD1	63.3483238077207	1.39625270608571	0.393377561035316	3.54939590964711	0.000386116082642267	0.0064511087038385
MANBAL	31.4763808433274	1.40330063300938	0.374937226663317	3.74276154303958	0.000182008932151239	0.00377825657071979
RUVBL2	20.5352143912063	1.40902462495526	0.399735625449973	3.52489129126069	0.000423656610566947	0.00685772611088448
C12orf10	21.7576041968173	1.41280404747333	0.365507509339347	3.86532153614836	0.000110942946329501	0.00261305876357659
SEC61A1	180.650849421639	1.41808338550746	0.411563119673956	3.44560364551344	0.00056978541453484	0.00856183215350088
MAP2K7	68.6197686976876	1.42159593393181	0.28982460868529	4.90502148999869	9.34171110269055e-07	7.03917075895679e-05
GOT1	39.0166466606019	1.43176819851833	0.368904227554503	3.88113795282217	0.000103968841567008	0.00247906543185525
OTUB1	82.3358912178743	1.43807351150884	0.417680897201791	3.44299564845571	0.000575308570842652	0.00860154716806799
GNL1	87.218839681498	1.44409778908275	0.379207049735128	3.80820396163899	0.000139979795705826	0.003083948860625
POMT2	26.2610787157988	1.45053058134104	0.391481917721874	3.70523009027344	0.000211198924299469	0.00416298317376039
EIF3B	116.155223176034	1.45374053878047	0.309873543558312	4.69139934338054	2.71342758324551e-06	0.000155093808179191
LRRC8A	25.2863595200581	1.45946740845699	0.393245621952393	3.71133797042926	0.000206166618499059	0.00409794746187979
CBR1	122.994819350546	1.46676044311243	0.391837953639426	3.74328323606489	0.00018163129451169	0.00377825657071979
POLR2L	104.554455169391	1.47327321356401	0.367140980267881	4.01282693228375	5.99959010152815e-05	0.00166290262999664
THAP4	29.2316263459836	1.47680955946021	0.422912283155905	3.49199968475681	0.000479418813168455	0.00755246731718598
FIS1	88.4087706401103	1.47932212870024	0.379948240536967	3.89348329817126	9.88150087089126e-05	0.0023799276089449
RDBP	45.7064722985668	1.49611269186185	0.355214051869484	4.21186235169426	2.53273870616819e-05	0.000874453658493792
GLTP	133.618281119225	1.51427628566963	0.386237663832766	3.92058161972854	8.83355104391359e-05	0.00218479504701018
TALDO1	243.730852615464	1.51548721359198	0.436312968887839	3.47339483732275	0.000513918715205189	0.00795242612932796
TUFM	61.1769280392272	1.51624007758647	0.430034631464161	3.52585574892899	0.000422116820936054	0.00685136894416047
SPAG9	389.104726949495	1.51830898068007	0.423973607941962	3.58114031684705	0.000342097856612802	0.00588540706601018
CHCHD2	1642.97184440608	1.53114559964449	0.421864766389738	3.62947020379973	0.000284003509409911	0.00515608802949969
RASGRP3	38.4002985385515	1.53540562160665	0.445868727775871	3.44362707217822	0.000573966801145226	0.00859223985774546
ELOF1	44.5228326206284	1.53786615165592	0.34779484587044	4.42176234040225	9.78991052299232e-06	0.00043061640665857
NUDC	76.612576648508	1.54069352995986	0.27499160721536	5.60269291692696	2.11046934406412e-08	3.93932293502969e-06
PSMC4	207.738790872815	1.55665556564263	0.407421320089416	3.82075136691666	0.000133045726832533	0.00297633755195025
C1orf122	416.415175102762	1.57155247865302	0.450653973281835	3.4872708814889	0.00048797683695789	0.00762541724810245
SUN2	153.372372345089	1.57618136001722	0.443893480978175	3.55080988471357	0.000384047725716036	0.00642553799916493
SIK3	60.1070611101202	1.57908877143085	0.390507247996228	4.04368620437513	5.26173315672776e-05	0.00151827691522391
ELOVL1	66.7300925674633	1.58154746074324	0.36597721881653	4.32143690762372	1.55016379382302e-05	0.000625616779763844
AURKAIP1	39.8720196677312	1.58281848415314	0.329778659933127	4.7996388986301	1.58951964572476e-06	0.000103521949664139
C21orf91	35.8180608387118	1.59654691446973	0.466603115323684	3.42163792318919	0.000622451454648473	0.0091573954153087
ZNF787	31.9580093940471	1.61427698858784	0.433354190919746	3.72507529040325	0.000195256935870025	0.00396016868574417
KEAP1	37.3134666130726	1.62409117298054	0.37651476198249	4.31348604880483	1.60700285120019e-05	0.000639733115310246
EIF6	86.6372713431675	1.62759323818871	0.451535654495969	3.60457302094013	0.00031266653422256	0.00549419882107109
TUBA1A	157.685298223312	1.64211502245526	0.468758898679151	3.50311221201847	0.000459855696897942	0.00731746654391108
CADM1	210.031626834552	1.64632695426157	0.435470278025812	3.78057249216901	0.000156468150957709	0.00334976439308385
C19orf47	25.8414047736995	1.66732095816695	0.458518506468508	3.63632205602471	0.00027655853182435	0.00505163336570899
FBRS	48.794122259369	1.68701685882433	0.483925498153867	3.48610863709424	0.000490101928275117	0.00764328672999289
COQ4	26.8560758920656	1.69134237347982	0.447540282824436	3.77919583641885	0.000157335650770001	0.00335965528772825
SNRPB	340.582300961589	1.69290859194713	0.45690837987406	3.70513798064671	0.000211275689316206	0.00416298317376039
EIF4G1	79.0150788683964	1.69555449095565	0.446911770853956	3.79393563010389	0.00014827812916194	0.00322860529370586
FIBP	13.8334403885796	1.69972244467766	0.434961840685507	3.90775071670396	9.31593505897411e-05	0.00228517782781324
PKP4	61.8806065780737	1.72618982214514	0.504655975882939	3.42052785390092	0.000624997351145161	0.00915954760213415
PMF1	32.5574285260156	1.73930782149921	0.492633621143779	3.53063158267791	0.000414568752534842	0.00679346819997425
SERTAD1	40.8441256515771	1.74131792294722	0.482570552990386	3.60842142595864	0.000308065785730963	0.00547406643811905
EZR	231.285854851905	1.74340045777844	0.485663040928782	3.58973261470413	0.000331017329276976	0.00573923514592563
PSMD8	86.6356778657831	1.76112724835301	0.437534659053926	4.02511483812749	5.69475180426786e-05	0.00159979716974694
PES1	16.8538956977039	1.76157631856314	0.455875556807118	3.86416049788006	0.000111471911763436	0.00261305876357659
SEPW1	205.175236342522	1.77169569031148	0.491173849255271	3.60706436834486	0.000309680857313205	0.00547406643811905
FADS3	33.4524129158298	1.77604312705644	0.497490659898386	3.57000295728005	0.000356977197760462	0.00608216850332036
ASNA1	32.8192044387566	1.78540214330346	0.423181217348703	4.21900138784344	2.45386762986464e-05	0.000857131658080789
KIF1B	93.7725642431899	1.79072801654485	0.459494866162539	3.89716653746336	9.73246953023742e-05	0.00236309107740277
UPP1	32.6058750996636	1.79579089592698	0.489663233172031	3.66739990726663	0.00024502941804697	0.00463152124681821
PSMD2	105.686116750922	1.81061610835929	0.474758848341304	3.81375958486116	0.000136868619399899	0.00303909391700965
NDRG1	239.380051646905	1.81327014724811	0.488151934795665	3.71456101676034	0.000203556750963401	0.00405281491168132
TIMP1	201.641856767995	1.81750437467294	0.524513130358474	3.46512655160945	0.00052998202338887	0.00811550594235424
ITPKB	60.1276470320036	1.81978063971776	0.463468307799018	3.92644029612248	8.62122791946227e-05	0.00215604739980575
ZDHHC9	110.072008333319	1.82807049565657	0.539005176152462	3.39156389685484	0.000694949567511445	0.00995427761809559
RALY	26.3237832360964	1.83113691550724	0.51382898083451	3.56370890667413	0.000365651435860223	0.00616959329489579				differentially expressed genes were considered significant when: p-value < 0.01 and adj p-value < 0.01
SCAMP3	139.932780578465	1.83568791199841	0.419776152162614	4.37301619575402	1.22541629284598e-05	0.000515451515293596				gene expression of CD271 positive NSCs of Cntr and PD donors was compared to CD11b positive cells of Cntr and PD donors
TMEM138	65.1664750783527	1.83649499411098	0.499347652885044	3.67778837749691	0.000235265021432156	0.00452850655050304
FEN1	36.3378316918889	1.83887125241218	0.45913266438668	4.00509786178813	6.1991811440568e-05	0.00169619659938528
RABAC1	18.1487987600291	1.84170297325139	0.473431589055004	3.89011425479135	0.0001001970347922	0.00240835770146402
ERI3	34.4082476456371	1.86116399736845	0.451287045516939	4.12412458070125	3.72147439140186e-05	0.00117922368911636
MAP1LC3A	50.4177775261761	1.86871389090675	0.485430613289711	3.84960041609795	0.000118310673733492	0.00272845426335965
NDUFS8	32.2441064468612	1.87082776846972	0.410672435445899	4.55552310550966	5.225537093591e-06	0.000262286832437135
NR1H2	44.929340926097	1.90033448343782	0.53068528925519	3.58090665393216	0.000342403977136872	0.00588540706601018
CDKN2A	86.4126306456957	1.91171291064668	0.485737907374532	3.93568811826876	8.29586514324579e-05	0.00210408503187291
ZNF622	59.4752681311096	1.91765834336565	0.549734117576353	3.48833787471688	0.00048603347509658	0.00761962715682907
MRPL54	11.7319435534256	1.94085283565429	0.566820430079321	3.42410529448045	0.000616827163350437	0.00909436179428822
CA2	62.0744420844901	1.97070165540931	0.562882808897406	3.5010869478668	0.000463364641309926	0.00736084309187284
CAPN3	45.5991363244888	1.97181645318395	0.576712855136012	3.41906103812947	0.000628376290189661	0.00918798428715506
TTYH2	32.7187035076458	1.97199210208834	0.528442697834093	3.73170470548816	0.000190188368843441	0.0038970673313958
POLR2I	26.506319371205	1.97205606187165	0.494119795557292	3.99104848581804	6.57818287613558e-05	0.00176988677113324
RHBDD2	32.2698791453658	1.98193862985762	0.517563887802294	3.82936034867778	0.000128476765445702	0.00289904122353236
DDX49	14.1101333853937	1.99196758341271	0.529440663493234	3.76240005871436	0.000168290566083194	0.00353943503948915
FBXO32	36.2839615118335	1.99595454541502	0.425338533987686	4.69262572262687	2.6972067593354e-06	0.000154907845899138
ACOT7	23.8157333384985	2.00903184581331	0.481606177022802	4.17152424878095	3.02568850861424e-05	0.00100641517754948
SLC20A2	52.1850835678799	2.02850964841616	0.523126357689853	3.87766668338819	0.000105463070284406	0.00250968493549307
STMN1	303.166927778195	2.03691199393849	0.407992704088809	4.99252063462171	5.95963442180168e-07	5.19662721188634e-05
MARCKSL1	117.256528420983	2.09126079897662	0.579841287477742	3.60660898790671	0.00031022459221552	0.00547406643811905
FAM107B	197.772932948726	2.12452416823437	0.418922428173277	5.07140230590761	3.94894970711007e-07	3.86673386894565e-05
BCL7C	9.72851706882279	2.12569263719701	0.573469928338332	3.70672032159793	0.000209960586061199	0.00415951768007808
TSC22D4	62.3531095038008	2.13603388928768	0.538420284839864	3.9672240244867	7.27146364341302e-05	0.00190548910009149
CLDND1	2540.74973393856	2.14230000395042	0.492244571557376	4.35210488390468	1.34836726124046e-05	0.000561240254452214
CREB3	19.8286863233899	2.14804033904249	0.595576382644896	3.60665802344824	0.000310165999716932	0.00547406643811905
AKT1S1	17.2565065343915	2.15434390780746	0.57476246124564	3.74823349308253	0.000178084430392838	0.00371273404096483
SLCO3A1	65.3132606370059	2.16517305416323	0.527825671675341	4.10206090827466	4.09486439511941e-05	0.00127057792374277
C12orf44	29.3513011973939	2.17587120394572	0.5554322081492	3.91743793755878	8.94950764363774e-05	0.00220434676929683
SLC12A2	83.2443583209058	2.17625123808309	0.402219062000641	5.41061188711045	6.28097653257631e-08	9.04006574194658e-06
LSS	20.4960599542271	2.17718777014024	0.50138218003121	4.3423716614833	1.40952824632788e-05	0.00058263752355131
ADAMTS4	21.1724324384946	2.17783915638856	0.603700168983834	3.60748475531216	0.000309179697634433	0.00547406643811905
RGS3	10.931500606122	2.17888464339048	0.632111086069676	3.44699640839761	0.000566856117927865	0.00853929783703187
TSPYL2	223.801801838834	2.19362738543683	0.550210761630213	3.98688564167185	6.69462732101448e-05	0.00179716894329975
SYNE1	128.863039942614	2.20311398609089	0.627864953121862	3.50889785317145	0.00044996768389072	0.00718624859860768
NFKBIB	196.435926820714	2.20473785565038	0.630112561530246	3.49895874206366	0.000467078848956895	0.00739036282071399
ATP6V0D1	27.3780596356635	2.20503760486012	0.636608366743805	3.46372702598725	0.000532746832720269	0.00812796125629162
TMEM208	91.236296473826	2.20590269728456	0.593145736000047	3.71898938726314	0.000200021454609903	0.00402865738336106
CKB	475.016371906419	2.20960057358415	0.631270224316422	3.5002452016121	0.000464830375257044	0.00737156195816786
LOC100506990	96.3081658214252	2.23901986199359	0.567256555695823	3.94710266370938	7.910264334438e-05	0.00204095070711007
INPP1	30.246576128862	2.26231942227468	0.407732984019282	5.54853178659614	2.88078514922625e-08	4.98751585400824e-06
GATS	18.4756230578468	2.26797184266659	0.621218375665849	3.65084474559479	0.000261379211069518	0.00485604363209403
GEM	111.321440874799	2.28222694568966	0.639439827408782	3.56910353072311	0.00035820485941182	0.0060869349225229
PPIF	530.886551675629	2.30004216776858	0.633948292581008	3.62812266344999	0.00028548962248374	0.00517520338420449
HDGFRP3	35.4760435110271	2.30362955122916	0.571092848343001	4.0337215882024	5.4900360693514e-05	0.00156152311629695
IFT46	58.6100609253566	2.30416744584211	0.674005330912622	3.41861902297153	0.00062939783840286	0.00919167063271463
PCYT2	14.1408960897508	2.32123601506455	0.674560178291147	3.44111035570599	0.000579332199763344	0.00865087807296613
NAV2	44.2162223794841	2.32188233398399	0.562092181726356	4.13078567798753	3.61525517212857e-05	0.00115620072951389
LANCL1	104.940070068611	2.33905475287463	0.647878184301047	3.61033109240757	0.000305806393491556	0.00546063255104652
PUF60	50.9143271876249	2.35970680786025	0.398070877789084	5.92785591592695	3.06915608644535e-09	9.40106118171183e-07
PPP2R3A	26.4498855664025	2.40402708266435	0.627092158323873	3.83361050007382	0.000126276036709649	0.00285850248475005
TSSC4	20.6204491867038	2.40702654946278	0.698847987861336	3.44427771313892	0.000572587243683423	0.00859223985774546
NDFIP2	22.2074774694593	2.41745911248922	0.578291011561805	4.18035048817433	2.91060131445543e-05	0.000976686609620354
ZNF555	52.0308166282939	2.43860068406582	0.698387667626362	3.49175794062055	0.000479852895843308	0.00755246731718598
SLC48A1	133.936240280984	2.44092247839124	0.563428745869122	4.33226472076069	1.47583340931459e-05	0.000601625593097251
DNM3	34.5075209772464	2.45549834253537	0.606050910535319	4.0516370817205	5.08605133556195e-05	0.00148236402527567
DHCR24	49.6480435423517	2.45877365520084	0.626330589139381	3.92568030020593	8.64849601911673e-05	0.00215688796334799
CDS1	42.0177773106893	2.47066174107705	0.70774554110066	3.49088987156989	0.000481414648913078	0.00755740592717471
HRAS	11.7199987837369	2.47326733909973	0.479665569717124	5.15623279060512	2.51967616863888e-07	2.78793906062443e-05
KCNMB4	92.3195046111314	2.50848847862514	0.733260104255843	3.42100772163366	0.000623895608520766	0.00915954760213415
PDE4DIP	96.0299978190334	2.52622507108774	0.678942815244879	3.72082156901032	0.000198575709541249	0.00401385012889977
RUSC2	9.45241766196488	2.52697562093859	0.668009794598062	3.78284216994012	0.000155047735388941	0.00333729774226359
KDM6B	94.1465903962192	2.53001668849103	0.694338359100978	3.64378066590887	0.000268662388764679	0.00495284088917108
PIR	49.5651522602149	2.53599914927349	0.684510922747928	3.7048337214151	0.00021152944805563	0.00416298317376039
GNAI1	39.6527480406682	2.54375001723627	0.579207267789929	4.39177848534672	1.12427212726211e-05	0.000479662672581187
MICAL3	29.7736010698601	2.54886223241555	0.542544519681561	4.69797802752035	2.62749689966312e-06	0.000152369310501823
CCL5	15.7334470457025	2.56378624236898	0.68234793588321	3.75730050249291	0.00017175619670847	0.00359849794224404
PRKCQ	13.428943961547	2.56584339571109	0.703413706808804	3.64770173068082	0.000264596547802647	0.00488542559513203
NAP1L3	21.8415629893326	2.57151369846868	0.753745890861721	3.41164539620746	0.00064572054134274	0.00938415764827295
TPRN	11.5661530192224	2.57778786195387	0.648769318550376	3.97335044714157	7.08686613362863e-05	0.00187715527344407
PGAP1	11.1515014801648	2.58354667819814	0.674716189320416	3.82908653903848	0.000128619776366328	0.00289904122353236
MIR100HG	15.7620096044891	2.59766403917982	0.706420407110056	3.67722111795551	0.00023578863840724	0.00452850655050304
LHPP	35.4837711846367	2.60198091303591	0.698457358746224	3.72532536231938	0.000195063459813645	0.00396016868574417
PHLDA3	14.3553382920165	2.60864566097428	0.646183180501046	4.03700643980172	5.4137583336007e-05	0.00154719514481325
SQSTM1	876.691131259018	2.61017850056712	0.608399141421145	4.29024027626019	1.78479909159483e-05	0.00068556945171035
LAPTM4B	16.1593396506027	2.62051832281239	0.704879662374583	3.71768184371279	0.000201059256791225	0.00403197494780474
MT1F	103.620012510703	2.62808202301152	0.750882468777498	3.49999118675692	0.00046527354063775	0.00737156195816786
KLHL21	97.8344672472239	2.63166354759622	0.532562492480242	4.94151124939362	7.75193428427719e-07	6.09240835262996e-05
SLC9A3R1	21.871238110226	2.63288841979406	0.568509149060758	4.63121556468157	3.63525146152646e-06	0.000190860644314255
JAM3	26.4944534793208	2.63951897157371	0.721323196155713	3.65927365935409	0.000252931128201852	0.00472317778146615
PLEKHG3	33.4893872046745	2.65070825446317	0.744398193670609	3.56087410877853	0.000369622277583281	0.00622779651341308
MTSS1L	45.8667839092413	2.65423990782715	0.766052547763296	3.46482746591856	0.000530571751295719	0.00811550594235424
RFX2	26.396463170953	2.67546103696558	0.763759260837048	3.50301616511123	0.000460021544824814	0.00731746654391108
MOK	33.8987508491521	2.68252903640562	0.708229774098123	3.78765357587743	0.000152076685499329	0.00329113783509961
EMP3	80.5212550158151	2.70567351081558	0.720877945890745	3.75330321344807	0.00017451954479579	0.00364477357015823
VPS37B	24.7994498628179	2.71099596854371	0.653799271297108	4.14652644559426	3.37557207480901e-05	0.00109876250696644
DUSP14	88.4161210098277	2.71443274535599	0.636002447991038	4.26795958715278	1.97269053599844e-05	0.000734135861153813
FAM102A	57.5101131553846	2.72738960819307	0.548112871506018	4.97596343741971	6.49239022831616e-07	5.48548910398036e-05
BCAS1	209.44281419929	2.74259778526243	0.637340818922816	4.30318866112758	1.68357370909115e-05	0.000657086278898815
SPARC	92.4368898710622	2.75662257500511	0.684877897900277	4.02498399124349	5.6979191542295e-05	0.00159979716974694
FAAH	21.445068491633	2.76213324054564	0.662226067832011	4.17098234986171	3.03289355363981e-05	0.00100641517754948
FERMT2	104.269895318416	2.77611155381085	0.685291415131961	4.05099420846571	5.10004699806045e-05	0.00148236402527567
JAKMIP3	7.80927223837417	2.78964288051301	0.790438595819538	3.5292341432552	0.000416764216567395	0.00680589320439542
IRS1	12.7459529954631	2.79737766978168	0.774709374475996	3.61087365397352	0.000305167306303289	0.00545737820523817
NMB	96.1643426944701	2.80745868321945	0.741702528402147	3.7851545272032	0.000153613097310801	0.00331238639074878
SLC22A17	231.227378769803	2.81724236254713	0.737193909298533	3.82157574419984	0.000132601672402371	0.00297196919046664
CDC42EP2	10.2332748539139	2.81992560701655	0.667937529797178	4.22184033868082	2.42315732729104e-05	0.000851383453877022
THRA	43.9991040507695	2.82794376761831	0.746880793731787	3.78633885266817	0.000152883163128436	0.00330260807727358
LOC344595	20.9733396515203	2.84879868662726	0.778538585516637	3.65916184454339	0.000253041501769491	0.00472317778146615
TRIM9	13.6407614031699	2.85389150113156	0.835714566018279	3.41491176195335	0.000638026768300094	0.00929496070013771
TSPAN5	51.121615797914	2.85748542098765	0.68258253864779	4.18628555404945	2.83556579275178e-05	0.000962320140915136
ATP1B2	114.030313124973	2.86041875780415	0.795405287404867	3.59617770097645	0.000322927244761311	0.00562606315240952
KIF9	13.4383686990015	2.87508180558392	0.833063908713355	3.45121397711781	0.000558070926459946	0.0084495757762871
IQCK	49.1497635325782	2.87808343443751	0.790634524505271	3.64021977947198	0.000272405424992912	0.0049910355935051
TUFT1	45.5960642388304	2.88637913514344	0.764454804298071	3.77573549007091	0.000159536219438616	0.00339113821603863
NFKB2	175.795228625174	2.88899642671049	0.733876114790722	3.93662686178899	8.26349444064992e-05	0.0021003341401703
PFN2	124.44414971146	2.89315373380556	0.745170697749968	3.88253824599034	0.000103371751206081	0.00247906543185525
ADA	11.3912641931713	2.89950435881288	0.800518078889714	3.62203482379108	0.00029229476112556	0.00525866448253906
APBB1	63.0446753412106	2.92143715758554	0.642068359416715	4.55004068451451	5.36355441721744e-06	0.000268087954259747
FGF1	31.8555806685092	2.93349593808188	0.589953775358017	4.97241658687863	6.61234246587287e-07	5.48548910398036e-05
PHLPP1	56.817516637295	2.95254438907846	0.634514961600378	4.65323052687605	3.26774567183885e-06	0.000174270043731192
MAP2K3	21.6416112963286	2.96836143185474	0.752634591405099	3.94396094167434	8.01467173595652e-05	0.0020545765784922
AP1S3	26.7890747648185	2.97369156365668	0.797885312021735	3.7269661677588	0.00019379846062176	0.00395023436972006
NEFM	24.6473916251998	2.98692767689279	0.775717548406273	3.85053513747303	0.000117860018779942	0.00272331873180887
SOX13	10.5027051840467	2.99759634551868	0.816219688627415	3.67253619005387	0.000240155127730472	0.00457887381207824
CAPS	26.7095616858935	3.00139800549945	0.863416406346728	3.47618829505327	0.000508595063539453	0.00788025503118328
RELB	66.3138530948795	3.00312123869595	0.761266473391171	3.94490148149847	7.98327937536958e-05	0.0020545765784922
TMTC2	11.1847441367691	3.01327012841169	0.853316184384348	3.53124689716943	0.000413605484549678	0.00679346819997425
RTKN	14.4620064075172	3.02728827135174	0.857542750093895	3.53018933577396	0.000415262378837571	0.00679551284601866
SPAG1	55.4809006383214	3.04054098982187	0.760288442717985	3.99919401504002	6.35585620659025e-05	0.00172585463506011
TUBB2B	28.5472495982979	3.04898693704625	0.807178911239587	3.7773372106116	0.00015851404687066	0.00337541676277524
WASF1	21.2656093025946	3.05617409179447	0.659968292437779	4.6307892770206	3.64274459263772e-06	0.000190860644314255
PLEKHA6	15.0187302687121	3.05996835845343	0.654076905607106	4.67830056713775	2.89262323129134e-06	0.000160722219167471
CLMN	35.5903774092524	3.07197182376396	0.696801506990927	4.40867563135733	1.04004658805628e-05	0.000450323117332512
ERBB3	37.7994866409001	3.07843916917182	0.823410929848073	3.73864258729213	0.000185016545367426	0.00381728437125954
CNP	268.969368970564	3.08376264757316	0.615324723327633	5.01160205443459	5.39787431189298e-07	4.77651900221285e-05
GSTO2	9.30830331980341	3.08546179252336	0.861223769959599	3.58264820380898	0.000340128531092102	0.00586316801215909
C1orf198	82.5619916515778	3.09031613048939	0.6415689791057	4.81681039940096	1.45871174013733e-06	9.80351347699987e-05
CRNDE	21.0208296455578	3.09342164649311	0.905476457174274	3.41634685472306	0.000634673509830217	0.00925739896023416
TMC7	10.3559567104313	3.09442777909813	0.778542924534814	3.97463990947844	7.04858176676778e-05	0.00187116350635129
NECAB1	29.0325578268118	3.09671107480554	0.773230157214808	4.00490209274812	6.20431728519157e-05	0.00169619659938528
SIRT2	24.8663661626244	3.09900606534565	0.802124836703711	3.86349595915874	0.00011177574319334	0.00261305876357659
QDPR	228.047596585518	3.10531327513812	0.597465611618208	5.19747616390428	2.02012433469866e-07	2.32042358676059e-05
FLNA	77.1199679619441	3.10831787403108	0.878884171123157	3.53666384736325	0.000405215063964091	0.00667682641946902
DOT1L	32.7326808154634	3.12414395366392	0.839800406184996	3.72010293238143	0.000199141599912573	0.00401848910904662
ST18	21.5382206929397	3.13109122011932	0.809935898156188	3.86585065219015	0.00011070266896734	0.00261305876357659
FAM134B	72.1640546580183	3.13547663501023	0.755693746552129	4.14913666986913	3.33731526634038e-05	0.00108927781889897
CSRP2	19.3469311712175	3.13908094941384	0.907351744232394	3.45960755502758	0.00054096318397731	0.00824278851504203
PSAT1	136.725173403697	3.14409834902921	0.626159843466495	5.02123919608627	5.13391778523702e-07	4.6461955956395e-05
TMEM222	14.0898208266722	3.14588807785863	0.691813652110698	4.54730557609067	5.4337077137337e-06	0.000269340549162916
WWTR1	18.5021747768114	3.15485939797153	0.914017001065046	3.4516419216441	0.00055718664081302	0.00844689290755372
S100B	196.322692672491	3.15684958856822	0.639011553302679	4.94020737536325	7.80395283713922e-07	6.09320396029184e-05
EHD1	52.6286688816233	3.16528514502123	0.71170914653009	4.44744199291727	8.68989148144503e-06	0.000392733086190734
PIEZO2	14.7826264903817	3.17273586429875	0.813818774016026	3.89857787212497	9.67592846157744e-05	0.00235414748272921
DKK3	18.1711303874329	3.17329113945642	0.919866791731769	3.44972899117522	0.000561149583582897	0.00847470660617104
FAM179A	12.7075197775895	3.17419676774001	0.886699868777833	3.57978711795131	0.0003438742337148	0.00590218620108764
TEAD1	61.0704199473284	3.17600785135246	0.800575826302604	3.96715432443246	7.27358973415135e-05	0.00190548910009149
CNN3	25.8629848464315	3.18599705348391	0.856770355155422	3.71861261808709	0.000200319980388119	0.00402865738336106
C16orf55	13.4537437416987	3.19243408984287	0.881366594700394	3.62214101264876	0.000292174769413607	0.00525866448253906
EPB41L1	40.0633641598315	3.22662712937171	0.855263297030585	3.77267110675079	0.000161509130578965	0.00341484614848905
ANXA2	93.6075612530551	3.23121525406366	0.758107276825912	4.2622137431424	2.02411697626937e-05	0.000744003119954273
PLEKHH1	31.2659513274463	3.24899432574448	0.92066835661848	3.52895187760955	0.000417208989487311	0.00680589320439542
SEMA6A	15.7983220746175	3.26217336866899	0.888176719302682	3.67288772354916	0.000239824873606427	0.00457887381207824
CSF1	47.2621049772492	3.26711329547062	0.747330405912521	4.37171198926577	1.23276075307347e-05	0.000516721401972481
CADM4	11.0575780229742	3.27592651664621	0.961385518040938	3.40750557936604	0.000655595682013592	0.00951609479627505
LRRC48	10.6640011637865	3.27619966505066	0.890252114929163	3.68008074354459	0.000233160114163387	0.00450700764368257
SASH1	23.4432225388298	3.27624064839394	0.857826280817423	3.81923557444755	0.00013386587402952	0.00298351069245642
LRTOMT	80.0125977180963	3.27706017239539	0.808938266920392	4.05106335848232	5.09853981854684e-05	0.00148236402527567
SLC38A1	12.9752725260637	3.27863142661835	0.825619744778466	3.97111557391119	7.15368624804436e-05	0.00189066229909597
MYLK	38.5734901368518	3.28212841572547	0.738072022904072	4.44689449521657	8.71205992303235e-06	0.000392733086190734
TMCC2	20.5622361783459	3.28854664272927	0.771542193503909	4.26230304760721	2.02330800590167e-05	0.000744003119954273
STK39	22.342084718137	3.29058782834714	0.79838705373194	4.12154457285572	3.76340636023924e-05	0.00118935588305338
AATK	18.6483494083098	3.29670092517189	0.818084143006672	4.02978220926721	5.58285544154918e-05	0.00158415180771369
PLEKHB1	292.72670139648	3.30004368931025	0.68308847915182	4.83106331028721	1.35805808464894e-06	9.28187093581572e-05
OLIG2	28.6539084782378	3.30062390256027	0.799204949886547	4.12988420933682	3.62945984905163e-05	0.00115620072951389
INHBA	237.163049322077	3.31945362243952	0.950893000794469	3.49088027745091	0.000481431936261506	0.00755740592717471
MAP6D1	35.1510509983735	3.32843432340167	0.787745106567274	4.22526816815893	2.38656405720802e-05	0.000843487994893698
GCLM	53.4326495906487	3.33109135616233	0.738176542082352	4.51259443542533	6.40394056491475e-06	0.000306005895953886
RSPH1	11.4080289218549	3.33734270907044	0.983190504747208	3.39440087445567	0.000687789338413336	0.00986354314127937
PPFIBP1	27.7851806837176	3.33937213590122	0.616102394174221	5.42015770021	5.95464842338332e-08	8.6749061055777e-06
FYN	32.4844088217201	3.33965989882167	0.671864036289876	4.97073770649151	6.66986314706005e-07	5.49504725205375e-05
USP54	26.479262371558	3.34150308013997	0.671905850065688	4.97317158321108	6.5866313873916e-07	5.48548910398036e-05
MFAP3L	12.0417427955645	3.34520975789688	0.817716374037241	4.09091692927814	4.29671026615624e-05	0.00130606872365146
FXYD6	42.152825488636	3.34888361892871	0.789416126997905	4.24222853371932	2.213111591765e-05	0.000801146396218929
RSAD2	40.6191932142928	3.35456193922978	0.945954808827643	3.54621796720629	0.000390802815506073	0.00651120004746938
C9orf3	30.9087584371197	3.35618730522774	0.726299578041627	4.62094073395618	3.82003899663339e-06	0.000199275920758876
DNAH12	15.9407163862277	3.36255353774561	0.904723784456211	3.71666313577319	0.000201871312706308	0.0040394551115403
TRIM59	15.8588838192735	3.37360952227133	0.783788303197384	4.30423560610568	1.67563268515158e-05	0.000657086278898815
PRUNE2	16.1728303330535	3.38401062404804	0.929837859984931	3.63935560131191	0.000273321149939763	0.00500014465111854
FRMD6	7.90574998835253	3.39261145876845	0.974527191385191	3.48128968463794	0.000499005489653919	0.0077618744523512
PBX1	60.9729284587465	3.40160520675196	0.845191238409481	4.02465744102276	5.70583108429038e-05	0.00159979716974694
PHGDH	40.9245139497392	3.40413776403455	0.764732956678751	4.45140716678249	8.5309411650586e-06	0.000388971844113702
EN2	20.4270801959736	3.40581414427582	0.856178103602653	3.97792717419976	6.95186553883357e-05	0.00184959879124512
ENAH	37.6506562924103	3.40892144076838	0.702982403321645	4.84922727035693	1.23943350828282e-06	8.60829807555031e-05
DUSP8	19.8145479687187	3.41671189982895	0.874726112821177	3.9060362435155	9.38224457266779e-05	0.00229203054529835
UGT8	44.2089221385441	3.41941653082779	0.889127660721769	3.84581054204523	0.000120154579918907	0.00276563894356697
C5orf4	28.90602514611	3.42218043665464	0.847105790447444	4.03985012880981	5.3485367844648e-05	0.00153960531149919
PPAP2B	26.1415421390624	3.43667440787472	0.935823609516529	3.67235275208562	0.000240327631020681	0.00457887381207824
OLIG1	47.6913026661352	3.44521505282852	0.735056608534014	4.6870064330142	2.77230256128019e-06	0.000157704411414539
PTN	33.0170581079207	3.44665716814158	0.857104590545428	4.02127955696546	5.78828611432181e-05	0.00161181505644961
SEPTIN8	260.216683399184	3.44731402979308	0.604627463452007	5.70155052188878	1.18722536781201e-08	2.44527486963487e-06
PKIA	20.845958880401	3.47105496703868	0.827589491168588	4.19417477394187	2.73866769423524e-05	0.000934746407866692
ARMC9	22.3233630406404	3.47288591311128	0.977935118337708	3.55124368476968	0.000383415243481742	0.00642397494536833
MAP7	68.2365224887607	3.49354439693255	0.748272356787884	4.66881392215172	3.02943605177461e-06	0.000163754041061084
NEGR1	10.2036107478385	3.49936488631522	1.03241089529621	3.38950790064183	0.000700181911925012	0.0099813521716661
APBB2	18.9778847894948	3.50095768807113	0.720325524548152	4.86024383249117	1.17241261040245e-06	8.23861237874567e-05
RAPGEF5	34.6038488159479	3.50930895257551	0.749322165948946	4.68331128057756	2.82277342311104e-06	0.000158330783823053
SRXN1	54.8462603785423	3.50997344455453	0.838803001941513	4.18450272165248	2.85791023428522e-05	0.000967155684384453
RARG	23.4542742537898	3.51879003765571	0.915480880330261	3.84365213218467	0.00012121679757305	0.00277937785759628
SV2A	27.2463849324837	3.52269822436713	0.683429133137854	5.15444550657832	2.54382519343766e-07	2.78793906062443e-05
PARM1	10.3859080159088	3.52352726072324	0.917918525016344	3.83860567653377	0.000123734958984811	0.0028208737023522
KIF5C	30.8411439297041	3.52422657474162	0.738467962358895	4.77234863850308	1.82089945290417e-06	0.00011369720825132
ALDH1A2	33.2042281081546	3.52904420715409	1.03595747231896	3.4065531659851	0.000657887358498884	0.00953776988425688
DNAJB5	26.9411121540571	3.54235801126779	0.963872318568144	3.67513200973553	0.000237726463821075	0.00455839540418388
TUBB6	38.374905262345	3.56864796168806	0.940771768963503	3.79331956954855	0.000148646652564727	0.00322860529370586
C1orf61	45.0018193163266	3.56961267192636	0.675475498444989	5.28459237995154	1.25984961812962e-07	1.63588734110613e-05
PVRL1	11.219618461218	3.56974879087608	0.802468333428351	4.44846063348718	8.64878961474756e-06	0.000392733086190734
MOBP	310.980849798938	3.57969210193052	0.712024985066278	5.02748102525827	4.96964642929363e-07	4.60212373987145e-05
TCF7	9.35309320229431	3.58638906396953	0.909270241233341	3.94424990650187	8.00501457157877e-05	0.0020545765784922
RAI14	12.4797045172877	3.59666550789256	0.748514637107955	4.805070374828	1.54697082018273e-06	0.000102667296766127
PLS3	12.2072668618789	3.62144955079684	0.988150669790039	3.66487587522085	0.000247458567922953	0.00466229238502985
VWA1	44.4077071363311	3.62306569688293	0.869750062482403	4.16564005358291	3.10480245239544e-05	0.0010217622616065
LHFP	10.3027425950237	3.62927775220916	0.865018287334037	4.1956081222219	2.72140424398317e-05	0.000932793811223962
KIAA1244	26.640722500903	3.63655590864178	0.807337185030648	4.50438302120784	6.65660527649798e-06	0.000314966076766246
ARHGAP39	7.26393534715988	3.65187507931489	0.942291492401859	3.87552589486553	0.000106394663932148	0.00252682038833686
FAM229B	16.5355359961566	3.66325416060967	0.914572214112046	4.00542910016823	6.19050003385593e-05	0.00169619659938528
KCNN3	11.9115776031851	3.67473533619924	1.07159048940543	3.42923474268435	0.000605285768952198	0.00898060244958422
C16orf45	20.8065448439308	3.67592295491555	0.802650579146025	4.57973002252926	4.65576507026704e-06	0.000236671359699617
GPM6B	287.435283659445	3.68956818997334	0.638465639228106	5.77880462672034	7.52332274223449e-09	1.89207475192223e-06
MOG	11.3170586543545	3.69484442269075	1.00939634514176	3.66044957510903	0.000251773100475964	0.00471423426063616
SYNM	33.5153737521917	3.69553434843252	0.658116219232903	5.61532179337567	1.96196770082068e-08	3.72026446888949e-06
GPR37	108.738249912009	3.70639572302525	0.73679640070717	5.03042050621839	4.89405271292979e-07	4.56752763348901e-05
ENKUR	19.4793925896019	3.70793292176111	0.925853755260001	4.00487971312471	6.20490468718706e-05	0.00169619659938528
PPP1R16B	5.63545370086064	3.72030376637196	1.01350685203393	3.67072384257292	0.000241864549388904	0.0045862125507934
KIAA1324L	10.1493737136538	3.72769604781138	0.990729203033644	3.76257814587181	0.000168170735983896	0.00353943503948915
FAM131B	10.329519283688	3.73565543103992	1.00486883058322	3.71755528417752	0.00020115997563131	0.00403197494780474
ZIC2	9.24274663207937	3.73728829926609	1.08764977029689	3.43611372091399	0.000590123210576292	0.00879003974257405
TPPP3	105.102333335571	3.73775540874347	0.847944934651629	4.40801667183623	1.04321516755116e-05	0.000450323117332512
HBA1	14.4255521594259	3.75358610876928	0.822878814260048	4.56152964898555	5.07823036110874e-06	0.000255968522758671
CYP1B1	211.903855659812	3.75754028182103	0.92355922761745	4.06854283889787	4.7308064107054e-05	0.0014023378010493
SERPINI1	15.9870520165059	3.75828710854351	0.986206601829047	3.81085170345979	0.000138488830270133	0.00306368067853151
C10orf107	15.8690628323242	3.75896312195837	1.03692797045195	3.6250956952391	0.000288854471267135	0.0052124705645879
CADM2	23.4253283945639	3.79496553564225	0.931317261678644	4.07483646206884	4.60466943263649e-05	0.00137863110381643
C7orf63	29.3612371011861	3.79611893343555	0.941042730251533	4.03394958741234	5.48470897331787e-05	0.00156152311629695
SCG5	9.03912403163587	3.80167488972717	0.941269831304657	4.0388789306652	5.37072756792304e-05	0.00154227671938482
NGFR	23.653848331142	3.80228142057335	1.05508201825545	3.60377805211801	0.000313624897096845	0.00550156097021867
MAP1B	266.127650566939	3.80276291825014	0.66553331387197	5.71385810294943	1.1044310158285e-08	2.40079754259405e-06
AKAP6	19.4339069336182	3.81210363089424	0.939379841524211	4.05810670229929	4.94721643294041e-05	0.00145565141645089
C11orf88	11.4287820567821	3.81248666763251	1.10511761373018	3.44984698485074	0.000560904383050025	0.00847470660617104
SPOCK2	18.5716782385351	3.81298207076065	0.845992173163775	4.50711270353857	6.57157320149793e-06	0.000312764993884838
GNAO1	30.3590703505123	3.83165776038185	0.813821072915361	4.70823119221484	2.49875602834982e-06	0.000147045022239739
EFHB	30.699934252114	3.83707581111747	0.967014970245417	3.9679590587348	7.24907833344211e-05	0.00190548910009149
NT5DC2	3.37812255473863	3.84007691008113	1.09004054141738	3.52287530983743	0.000426892148622748	0.00690074913051061
TRIM2	80.6987675641301	3.84738094085182	0.654852047789547	5.87519112727623	4.22355768148984e-09	1.20130047769232e-06
GMPR	19.4661666425158	3.85340528047641	0.924072322493616	4.17002564266612	3.04565367834512e-05	0.00100784982940473
C8orf46	10.9088773581742	3.86370962401541	0.953635546385762	4.05155789196272	5.08777336708037e-05	0.00148236402527567
CHST3	9.23139635342034	3.86398991911272	1.05265019911437	3.67072549111153	0.000241862989299176	0.0045862125507934
CSRP1	241.91176055772	3.87589282642499	0.67871274771721	5.71065276062842	1.12543665147553e-08	2.40079754259405e-06
WSCD1	7.86269029460132	3.87592974418455	1.08457337099153	3.57369067676917	0.00035198471172546	0.0060068705232462
CRABP2	12.2326282593115	3.89056816900533	1.09850563647057	3.5416915852207	0.000397570026307912	0.00658087744115928
SLC45A3	34.8324611773361	3.89502294887369	0.748038719871001	5.20698039473864	1.91938363286926e-07	2.29289568782562e-05
NEK11	40.4885922705928	3.91473147313344	0.86464491325816	4.52755971047343	5.96687436597978e-06	0.000287924795899948
PCDH9	109.013703586161	3.92505669647554	0.680232723420789	5.77016741672912	7.91928156672622e-09	1.89207475192223e-06
DIXDC1	22.1441512122563	3.92704241448932	0.815326037396	4.81653011724189	1.46076125808302e-06	9.80351347699987e-05
HSPB8	362.97217034507	3.92864614864164	0.787461126700469	4.9890032859184	6.06916148233895e-07	5.21598583223174e-05
ITM2A	5.92982394377905	3.93384154345109	1.10341704133431	3.56514481477837	0.000363655340437937	0.00615329560463399
LAMC1	20.3425911032984	3.93399219816618	0.950980201850175	4.13677612900081	3.52219441407437e-05	0.00113412761376098
TIMP3	26.9972471205849	3.94073775276777	0.920990851935853	4.27880227527194	1.87901684953846e-05	0.000705872178760579
ELOVL7	44.4910357765412	3.95054589715851	0.9026236900263	4.37673633077745	1.20469558918848e-05	0.000508526272383235
ITGA2	36.7591320568762	3.97038945701824	0.811632771640816	4.89185453784919	9.98902606164549e-07	7.27615276417177e-05
PTRF	32.9977656467934	3.97045672755271	0.770962201573056	5.15000180223034	2.60483956067591e-07	2.80337057584094e-05
ERMN	189.480656285421	3.97470960852782	0.665434252780814	5.97310642173547	2.32777940128542e-09	7.51558181831232e-07
MAPT	55.2442351937351	3.97890800125646	0.777874896597362	5.11510015127277	3.13574533194618e-07	3.31501006508222e-05
LIFR	45.1635108649849	3.98251662261412	0.852056233479199	4.6740067921953	2.95379555759243e-06	0.000161214034957669
GRAMD3	31.6163575969943	3.98378205640417	0.994539234612004	4.0056560040674	6.18455997005988e-05	0.00169619659938528
C9orf24	55.2086940162066	3.98515544157078	0.961490150299131	4.14476990776344	3.40155089299797e-05	0.00110420997194983
ADARB2	41.8276022446671	3.98616868605932	0.974341035870086	4.0911431822223	4.29251998009595e-05	0.00130606872365146
NCAM2	13.0059075432194	3.98692902892253	1.16443015768259	3.42393144201725	0.000617221900489924	0.00909436179428822
SLC2A6	10.9389829126069	3.98762666209096	1.04908199473358	3.80106291224992	0.00014407671173221	0.00315227179185527
CYGB	13.8933299688455	3.99190309879271	1.05635315496039	3.77894748555221	0.000157492630263504	0.00335965528772825
MAP1A	116.284696044756	3.99269913847728	0.666389367328512	5.99154088319808	2.07862054008887e-09	7.09462884911475e-07
FOSL1	62.433204667117	4.00126654553321	0.932304764964489	4.29180102462054	1.77229729710941e-05	0.000682963339073194
PHYHIPL	16.3598489952122	4.00715434676608	1.01506359402714	3.94768797772382	7.89095550234717e-05	0.00204037563703548
RFTN2	21.0822027492193	4.02514510544433	0.986045159849866	4.08211030218656	4.46286053222194e-05	0.00134629626055362
SH3TC2	13.1084073819725	4.03129559304363	1.12103219482819	3.59605693007012	0.000323077123937128	0.00562606315240952
FAM19A5	18.8952886089255	4.03579566976265	0.942835543779226	4.28048740460687	1.86484441992836e-05	0.000704982007609626
RASAL1	3.7757469582011	4.04419469800403	1.18243093622245	3.42023755816485	0.000625664728222122	0.00915954760213415
MSI1	5.7588564829787	4.05278139564684	1.13245740905633	3.57874950813735	0.000345242170269669	0.00591716350938518
PEG10	22.9922923538867	4.05668166022752	1.01929766368888	3.97987928820145	6.89502703988734e-05	0.00183857127273424
PCDH17	17.5353376388831	4.06023321697087	0.819587311740408	4.95399716272925	7.27042666827959e-07	5.75182231650781e-05
WNT1	7.03584499150132	4.06980189197279	1.19736754908359	3.3989579015129	0.000676431273445613	0.00975923670601606
ARNT2	20.2842382058975	4.07003680733241	1.03014171666502	3.95094843892815	7.78420951290509e-05	0.00202152536611226
GZMA	4.11591336665079	4.07310506828175	1.1977912862591	3.4005131904096	0.000672594908025199	0.00972376154546971
TAGLN3	11.1261281082289	4.08253766119024	1.10181406012104	3.70528731566718	0.000211151245318685	0.00416298317376039
OTUD7B	11.3057451104735	4.08450182138342	0.823703759102359	4.95870241727992	7.09655729482489e-07	5.67590752237694e-05
F3	16.3510641294749	4.08793442885358	1.01599147882164	4.02359125452001	5.73173605099357e-05	0.00159979716974694
TUBB4A	50.7088319446188	4.09221336164176	0.817767651653652	5.00412721555649	5.61156910936754e-07	4.92910327797828e-05
C9orf9	7.4234342586013	4.10075839958882	1.16023284250089	3.53442709891715	0.000408660149220586	0.00672431700081145
RRAD	57.594771514561	4.11541597561247	0.972017097216611	4.23389258007605	2.29680686489613e-05	0.000816596869287179
AIF1L	25.1320514758347	4.12303360197292	0.948836007744794	4.34535954402974	1.39047720943997e-05	0.000576758359165621
PREX2	12.322716931472	4.12568111943909	1.18868000971329	3.47080886843064	0.000518893199069367	0.00798801308773538
NQO1	27.4132176985073	4.13165551835771	0.948377922474	4.35654966279646	1.32128724576823e-05	0.000551891518809347
TCEAL2	10.0479546073663	4.14739161256898	0.991418907567103	4.18328880043905	2.87322012464488e-05	0.000969590045452196
NKAIN2	9.9295185605089	4.14755900897055	1.16905295366631	3.54779396088366	0.000388471983122379	0.00648140546142449
HBA2	45.8076571291287	4.15136296586589	0.807574263854078	5.14053400619018	2.73958733412802e-07	2.9220634190619e-05
DPYSL5	18.2400437376421	4.15241001146911	1.1121505876324	3.73367604859066	0.000188705182981799	0.0038797224904673
IQCA1	47.4064026808645	4.15585060217059	1.01532559862311	4.0931210715128	4.25605347144284e-05	0.00130204362337166
CRYAB	2027.84534806339	4.15951259236964	0.659721179743059	6.30495536612852	2.88276959916731e-10	1.49728546224577e-07
PPP2R2B	28.3165945664081	4.16209036576644	0.864403411185027	4.81498604923429	1.47210174174862e-06	9.82442871895476e-05
FAM184A	26.9675023457231	4.17081118255745	1.06309431860495	3.92327483043142	8.73534065441439e-05	0.00216498712567706
C9orf116	13.995249998676	4.17103508639344	1.15585866636173	3.60860303061318	0.000307850252351943	0.00547406643811905
MYH10	21.1971182435647	4.17213609680985	1.20180290749232	3.47156432290168	0.000517435352731412	0.00797584867577993
SLC24A2	52.5510389455173	4.17399750789275	0.723264545349195	5.77105228610027	7.87780240137791e-09	1.89207475192223e-06
CCDC19	13.8240653784313	4.17728023835916	1.01786954301139	4.10394462339504	4.06164723677668e-05	0.00126355307006599
MEIS2	21.7886781476207	4.17882204566828	1.0315026169045	4.05119868547573	5.09559148064152e-05	0.00148236402527567
FAM171A1	93.4718793353082	4.18144843445406	0.800096167037516	5.22618230997974	1.73045742781751e-07	2.17600467712715e-05
CTTN	11.6253495532015	4.18255359686622	1.00045997370282	4.18063061672131	2.90701768231002e-05	0.000976686609620354
BAALC	22.7548298312028	4.18415622424437	1.02670229807403	4.07533540354721	4.59480727347645e-05	0.00137863110381643
NRIP3	251.282742682653	4.19201770216246	1.12035720936666	3.74167958854144	0.000182794480167552	0.00378451102267171
ZIC1	14.4487940585385	4.19379365558883	1.06759212363162	3.92827331970457	8.55579423247283e-05	0.00215173721897096
KAZN	15.8654356821202	4.20278624198076	0.987062034567112	4.25787447475268	2.06379769600583e-05	0.000751650221844073
FBXO2	23.7290592258932	4.20410178318598	1.17564099157119	3.57600816348483	0.000348880761208969	0.00597095927421539
TARP	12.8680042190598	4.21429349826316	0.988010932392218	4.26543205150505	1.99515729547779e-05	0.000737899351448225
RBP1	27.3551615595191	4.21956223576557	0.963985564912922	4.37720479367004	1.20211013746173e-05	0.000508526272383235
MAGI2-AS3	32.3406928661756	4.22210767956858	0.829966428549967	5.08708248229391	3.63613721401493e-07	3.65019287047246e-05
LIMCH1	80.5686578662586	4.22231482532792	0.720130622647128	5.86326243120604	4.53860039331562e-09	1.23624998151632e-06
ANGPTL2	11.3579567459489	4.22416359275093	1.00000874462622	4.22412665434222	2.39869132204019e-05	0.000845273349058764
SFRP4	9.41370083007221	4.23824789100586	1.13642573555424	3.72945433952078	0.000191894874356946	0.00391859174199671
ADAMTS1	13.2246205976894	4.25104909775662	0.809900826615399	5.24885141248946	1.53050457331403e-07	1.9659578099795e-05
CAV1	19.0605930578981	4.26828013501464	0.908258909301187	4.69940904658854	2.60915391210984e-06	0.000152043671385679
KLK6	48.8837498347446	4.26856703765765	0.901131416580855	4.73689737047876	2.17014993949934e-06	0.000129623055886295
FSTL1	17.4055629082111	4.27605969910422	1.24704681525128	3.42894881475849	0.000605923788244172	0.00898060244958422
CEP170B	36.870711364691	4.27858060998249	0.846018156207699	5.05731535261767	4.25199794099803e-07	4.09631995186794e-05
KANK1	22.4955183349331	4.28995203180465	1.00683036958685	4.26084885934164	2.0365192550206e-05	0.000746265614125032
C5orf49	17.4629426083728	4.31044165253645	1.01637460816381	4.24099698862383	2.22529122724992e-05	0.000801571261304386
NRSN2	6.926069145253	4.31823915151738	1.20821181058099	3.57407460653846	0.000351468712598323	0.00600664555178766
DNER	144.692849391777	4.32208519041706	0.875477862433209	4.93682978848228	7.94027133419559e-07	6.15938190638315e-05
COL4A5	21.254696789835	4.32799840707367	1.00352141448334	4.31281121121062	1.61191752643884e-05	0.000639733115310246
PPFIA2	31.1080976609502	4.32929299472221	0.917349495967837	4.71934961947589	2.36599876782745e-06	0.00014061801632073
KCNJ10	19.7322143357424	4.34833592438692	1.01312828545145	4.29198946158069	1.77079355011096e-05	0.000682963339073194
SORBS1	34.7738203753656	4.35701641378425	0.982630588542837	4.43403295662245	9.24864789099964e-06	0.00041225502875329
MPDZ	52.0889056709842	4.35811392914962	0.930604471527221	4.6831001381258	2.82568381906816e-06	0.000158330783823053
MATN2	19.035943365907	4.36038455068927	1.04476434185216	4.17355797476699	2.99879306614307e-05	0.001000658714194
CDC42EP1	65.8579432569321	4.36228603627409	0.811748481015968	5.373938034124	7.70353410748646e-08	1.08266374644745e-05
ANLN	79.9344898125438	4.36713253588164	0.890666839189924	4.90321671777251	9.42798695323193e-07	7.03917075895679e-05
FAM124A	15.9223574503559	4.36815685951795	0.973212354204359	4.48839026821551	7.17633725225937e-06	0.000334877050060509
ID4	26.7930590937048	4.36890093189465	1.09283135026463	3.99778147912458	6.39389360472303e-05	0.00172998948308877
MPP2	14.6446414381367	4.37435732743741	1.06510974533943	4.1069545617981	4.00910057697215e-05	0.00125373600765731
FAM183A	6.27266233630504	4.37916750816452	1.19611048402583	3.66117308279521	0.000251063071647022	0.00470831939387021
KLHL32	32.5018574287168	4.38698621529646	0.85919354366317	5.10593480089778	3.29163178615894e-07	3.36084045448331e-05
EFCAB1	8.64717857785788	4.39584516534565	1.15441616969923	3.80785134575077	0.000140179493664773	0.003083948860625
AMER2	97.4111650736556	4.40067710519982	0.822746226693487	5.34876607442563	8.8555912882215e-08	1.18863925313589e-05
ZDHHC11	6.20347005655376	4.40534902086069	1.14281735357491	3.85481460102094	0.000115817363992846	0.00270225435597371
SOX2	228.54684652502	4.40769272402349	0.862726857263775	5.10902458514266	3.23826219473985e-07	3.34110852689474e-05
ZNF704	14.0713723249989	4.41738790324698	1.0417143727108	4.24049818161945	2.23024241860406e-05	0.000801571261304386
AHNAK2	25.7845400861874	4.43396512370279	1.12857980386637	3.92880070023635	8.53705536500737e-05	0.00215155407996578
BEX1	48.0115613263829	4.43598287463614	0.808501625979226	5.48667155649	4.09577640804356e-08	6.54148991599269e-06
PDLIM3	6.62445231768359	4.43696474611125	1.06231322725184	4.17670102592009	2.95767359595769e-05	0.000989702206647355
NCALD	11.9288463972077	4.44081195516092	1.25285293465924	3.54455964647499	0.000393269512087118	0.00654317213285892
ITPR3	5.29224700383215	4.45774708572686	1.19620753449725	3.72656663427586	0.000194105773901363	0.00395023436972006
CLIP3	33.4615984357022	4.45824291510247	0.928210273343065	4.80305275985101	1.56264688928104e-06	0.000103134694692549
GRIA4	11.081206067889	4.46072600250299	1.08766621821562	4.10119017010667	4.11030583230461e-05	0.00127206511587334
FOXG1	7.34102585954719	4.46160495276245	1.21788762432759	3.66339624743766	0.00024889305748518	0.00467496299483956
SCARA3	19.657380782162	4.47502489739303	1.03143640479206	4.33863384751792	1.4337115715671e-05	0.000590590290825538
HIP1R	19.2587427513162	4.48106813779982	0.892045980798859	5.02336004449777	5.07752290925856e-07	4.6461955956395e-05
POPDC3	23.1176832850133	4.48807487928854	0.877964417427528	5.11190976559026	3.18918163229528e-07	3.34110852689474e-05
MGST1	80.2529355265158	4.50712753507282	0.906153516984765	4.97391165028012	6.56152223868118e-07	5.48548910398036e-05
KCTD8	8.81169529658779	4.51641477789687	1.23745710690426	3.64975460781471	0.000262490949299842	0.00486912559058372
STMN4	49.0089231538158	4.51832564437785	0.899647473766751	5.02232905235646	5.10486270267502e-07	4.6461955956395e-05
GJC2	8.79936747205971	4.52207600028503	1.04259689669511	4.33731964349729	1.44230798821124e-05	0.00059208973289249
MAFA	8.9345159606891	4.52794728213107	1.21857352514115	3.71577683965077	0.000202580322943821	0.00404010774271601
FAM69C	13.5353886402589	4.53324113731231	1.25765891740621	3.60450760899597	0.000312745286985463	0.00549419882107109
MAPK10	16.6238702941126	4.54125099807391	0.969705514269275	4.68312382599576	2.82535716118691e-06	0.000158330783823053
NACAD	16.287716521402	4.54285591993541	1.13155926166414	4.01468670165307	5.95248096884428e-05	0.00165368227101892
ARHGAP23	128.489818247151	4.55554708064715	0.750958890880758	6.06630687240976	1.30884941625448e-09	4.88609847705502e-07
MEG3	25.2037419978074	4.55697326459274	0.9497800088008	4.79792501670615	1.60317769026165e-06	0.000103521949664139
TMEM98	34.2690644995311	4.57365317112748	0.88728446717154	5.1546638539805	2.54086303123225e-07	2.78793906062443e-05
ELAVL3	95.4932205622097	4.57417385356811	0.76993099934322	5.94101790611114	2.8325766867913e-09	8.90472660537076e-07
CYR61	47.9426458060777	4.57455099050069	0.933756530162801	4.89908326499533	9.62848372568674e-07	7.10011522142308e-05
CERCAM	115.970091428864	4.57879969306712	0.843000055192379	5.43155325419547	5.58656385547489e-08	8.34213647718788e-06
LAYN	15.7735330601751	4.58296958028928	0.965381159209629	4.74731616270761	2.06133602484424e-06	0.000124998579455783
COL9A3	29.9690668459255	4.58520831076852	0.782095491839165	5.86272182695492	4.55340693007852e-09	1.23624998151632e-06
DOCK9	23.3796091068602	4.61495105867373	0.935187342126855	4.93478777009337	8.02379607871714e-07	6.18401728750677e-05
ENPP2	79.7492591404743	4.63509200028395	0.834753547806706	5.55264726033515	2.81375501041457e-08	4.94310549329594e-06
GRM3	40.0985710369927	4.64514351296199	1.03980711825974	4.46731266923455	7.92083197079666e-06	0.000366752940787352
SRCIN1	15.4739148294753	4.64529086420922	1.18672105218886	3.91439155447793	9.06324598032477e-05	0.00222776824034897
LINC00320	12.6251617504496	4.65000163280208	1.09667816284147	4.24007862138333	2.23441511815135e-05	0.000801571261304386
SOX10	145.489167159441	4.65274405215382	0.808407768500489	5.75544203488318	8.64153708788274e-09	1.94776985003485e-06
DAAM2	5.55370181981819	4.65346171310699	1.35756584821813	3.42779815742631	0.000608497696618176	0.00900757556852631
CLU	1032.49203138649	4.66835857854646	0.823459345991534	5.66920346617143	1.43462915892827e-08	2.85634665542619e-06
FUT9	19.3023466694037	4.67072109140707	1.21840209951259	3.83348082974868	0.000126342651259671	0.00285850248475005
ZNF488	7.79324296699519	4.67188271332074	1.22974440556039	3.79906807642015	0.000145241196850015	0.00317194028806266
TTLL7	81.3506291224934	4.67424327248773	0.762573179061474	6.12956684136266	8.81186490913785e-10	3.89876067424299e-07
XIRP1	223.180136355321	4.68753774796455	1.26673935436836	3.70047534388156	0.000215195988482152	0.00421153743281705
COL5A3	4.38364098300433	4.69570659912708	1.32544298189506	3.5427450771314	0.000395985287849576	0.00657005590090422
PEX5L	46.7571404250357	4.69648656783054	0.90251940209993	5.20375136191314	1.9530527607006e-07	2.30114574241002e-05
FA2H	63.271480319307	4.70518024267836	0.853433943007831	5.51323307589042	3.52301179665693e-08	5.92759139758644e-06
EMP1	104.75738698467	4.71698720144583	0.965339319171924	4.88635147016709	1.0272175498381e-06	7.43705506082784e-05
IL7R	10.5872891034516	4.71773823327985	0.995567095958325	4.73874463351824	2.15046303956233e-06	0.000129533421874533
LRCH2	4.34265391279911	4.71863442176878	1.28313283905019	3.67743251373853	0.000235593378833693	0.00452850655050304
NES	6.22208269515187	4.71871166103252	1.03072402442422	4.57805537584949	4.69318466792172e-06	0.00023756264424997
SH2D2A	6.79599577564659	4.72086750733144	1.32319525190022	3.56777845185876	0.000360020704928303	0.00610043594478512
SPAG17	19.8232013290951	4.72608728566342	1.13370543032495	4.16870834279128	3.06330673286681e-05	0.00101089122184605
CLCF1	15.0114257891786	4.72806488000458	1.22367469702326	3.86382499491587	0.00011162520839474	0.00261305876357659
PDE1A	6.11766571561509	4.73441242679842	1.30307270901931	3.63326803947995	0.000279854034708644	0.00510402488340375
NPDC1	8.95774501632608	4.73474234738935	1.37392971608867	3.44613140828506	0.000568673754801664	0.00855589001871622
DNAI1	24.8494240937613	4.74347600837965	1.26862669954518	3.73906367419214	0.000184706942042431	0.00381728437125954
TTYH1	15.5587016211345	4.74477611001426	1.36627741537442	3.47277650689554	0.000515104102754684	0.00796045745343785
C1orf194	13.9053789048724	4.75133636074398	1.37752273132265	3.44918907884874	0.000562272839717721	0.00848094866574229
CALY	13.2864637603586	4.77634161765753	1.10207970639249	4.3339348233643	1.46467554660985e-05	0.0005992128109521
LOC150622	31.1166242345287	4.78379074019161	0.954396043303562	5.01237486655216	5.37623370673528e-07	4.77651900221285e-05
NCAM1	98.7573376164462	4.79707199146622	0.83985987893294	5.71175277185642	1.11818453862653e-08	2.40079754259405e-06
ABLIM1	31.4248540560174	4.79950184362358	1.17090029653131	4.09898422422616	4.14967315872379e-05	0.00128093011767737
NCS1	34.7994055105509	4.80025774159346	1.02254485441454	4.69442266602753	2.67360728438343e-06	0.000154294263861084
CD22	6.74974488483423	4.82400278122873	1.17096013158835	4.119698571364	3.79368362991046e-05	0.00119576107237231
POU3F2	21.8317572292933	4.82419246501133	0.896101113208148	5.38353584646286	7.30366940398647e-08	1.03868612738122e-05
HOXD-AS1	6.48547245504795	4.83238611890716	1.23125539793095	3.92476339760839	8.68150228122979e-05	0.00216060888024106
CAV2	8.97815408946836	4.83338511121283	1.00687253432158	4.80039423706152	1.58353587558875e-06	0.000103521949664139
LYPD1	8.26067535351424	4.84245159066228	1.34235441686183	3.60743148741823	0.000309243158324718	0.00547406643811905
SOX8	113.022555797263	4.85629116674102	0.649404167426285	7.47807207026011	7.54208360395621e-14	3.00325769109536e-10
CDH19	12.6424298886092	4.88692187273476	1.06561929152247	4.58599230664522	4.51835239095017e-06	0.000231657672370347
PTPRF	38.8644931642708	4.88910710063935	1.02811555284332	4.75540622561172	1.98047774833047e-06	0.000121952511245133
PLXNB3	56.7569535149123	4.89275155466348	0.96237505277493	5.08403822455251	3.69493527942746e-07	3.67830807067003e-05
LRP2	19.4900637014912	4.89317179029226	1.09627952820246	4.46343442927871	8.06562886611518e-06	0.000370584624748507
ZNF462	6.77387673929358	4.90382779652121	1.29664265072221	3.78194238311524	0.000155609384098487	0.00333821871969276
CCDC42B	5.03964697734679	4.90384544079355	1.34263719197284	3.65239803434013	0.000259802769347218	0.0048342739604702
CMTM5	7.13632793435175	4.91668161367667	1.28160707954174	3.83634086621518	0.000124881050322675	0.00283617685770852
PLP1	2142.21176309661	4.91936210471915	0.703729623424578	6.99041498463562	2.74074336680249e-12	3.63788002886918e-09
SLC6A1	17.3256276800579	4.91985703051224	1.10159361490093	4.46612703991997	7.96483246591202e-06	0.000367366365396853
FEZ1	110.09797027779	4.92540340810131	0.815709090064198	6.03818624567941	1.55856116898938e-09	5.64199143174155e-07
CCDC39	70.5369615121796	4.92724301434851	1.33160563947642	3.70022690523139	0.000215406778122486	0.00421153743281705
UNC5C	5.09442908106727	4.92769609665194	1.3331403797557	3.69630698423143	0.000218758433432015	0.00426819013123834
PTPRS	24.5688695454889	4.93069867283971	0.892352830845618	5.52550348068851	3.28542063846557e-08	5.60680499244424e-06
PCBP4	10.9219187079322	4.93157292313294	1.24638471562309	3.95670202090656	7.59916249665081e-05	0.00197776895827866
ABCA2	89.636958918899	4.93513572155621	0.896568326647944	5.50447252582244	3.70275197274359e-08	6.13842802512293e-06
DMWD	7.07351858852894	4.95527472872333	1.15981956083858	4.27245314360842	1.93334187749771e-05	0.000721740689643362
SLCO1A2	47.7117310855981	4.95534325776331	0.891075741097849	5.56107974801119	2.68110638233101e-08	4.78037266318303e-06
DFNB31	16.1177140881514	4.95641156526941	0.98347909497931	5.03967149944726	4.66331585272372e-07	4.38645442335729e-05
SPOCK1	83.7037894372849	4.95917856845981	0.771735372625443	6.42600915335614	1.30997517900078e-10	7.6005251305552e-08
ZNF365	15.9669416110645	4.96381788773293	0.946404342781255	5.24492298201577	1.56347624314392e-07	1.98694544687204e-05
KLRC3	5.15046200133091	4.96449718138932	1.29296309844828	3.83962789606862	0.000123220926105046	0.00281452616300359
SLC27A6	6.92517596963797	4.96704589842554	1.41258830527116	3.51627284460073	0.000437650979209175	0.0070365795392097
PPP1R14A	90.9492739558631	4.97594198976428	0.88020152193661	5.6531849420304	1.57501676698233e-08	3.08445086858539e-06
CRIP1	20.4595954520896	4.98116526158872	1.12679678706471	4.42064205256087	9.8408068824535e-06	0.00043061640665857
INHBB	19.6093168814844	4.98288778651572	1.32013148253341	3.7745390155784	0.000160303819363778	0.0034014021778325
CD300LB	29.9870857267397	4.98377731335092	1.12733882650693	4.42083355613078	9.83208871520824e-06	0.00043061640665857
RNF144A	7.49834669626946	4.98678950950948	1.34654692115632	3.70339082222785	0.000212736759067915	0.00417985744050216
SLC47A2	25.5512233201431	4.99495236785314	1.18352083768312	4.22041776436429	2.43850000633315e-05	0.000854261615121873
SYBU	11.9584142484841	4.99635898516807	1.22650182103725	4.07366617763572	4.62788028441417e-05	0.00138211644694029
SERPINE2	26.9914769879094	5.00438425211648	0.990073823393879	5.05455667433154	4.31391645832298e-07	4.12272368089011e-05
TPPP	56.2301358718492	5.00661514697872	0.962794065194631	5.20008933163358	1.99192766572897e-07	2.31024931017459e-05
TCEAL7	26.0208547011357	5.01548762250436	0.817731477599483	6.13341635964379	8.60116485704903e-10	3.89876067424299e-07
IGSF11	10.3733525423117	5.01616825283035	1.24552909157339	4.02733929441486	5.64115992371958e-05	0.00159690275944915
PTPRD	55.8327274142864	5.02041688940489	0.935031455720638	5.36924919337137	7.90651083077267e-08	1.08564572855644e-05
ARC	89.8610822275546	5.02698539455528	1.27904146197631	3.93027555712527	8.48485646461252e-05	0.00214291956292307
TUBB3	34.6059012075657	5.03631417641741	1.07108811166572	4.70205403417757	2.57557315423273e-06	0.000150822533825805
GNAZ	7.52860174327753	5.04563011188217	1.06283197968729	4.74734502566124	2.0610419882551e-06	0.000124998579455783
USH1C	20.5830351153411	5.05518206694563	1.08154169075098	4.67405196690617	2.95314555176835e-06	0.000161214034957669
RIBC2	11.0931985141131	5.05777395073467	1.3930803458225	3.63064051969555	0.000282718729579597	0.00514057525655688
B3GAT1	110.502359509078	5.06148808964241	0.779443596960419	6.49371950629987	8.37426013458361e-11	5.71327312965334e-08
CCDC173	102.862875637455	5.06324857514516	1.21931183096393	4.15254608916768	3.28796506345436e-05	0.00107906677604466
CNTNAP4	51.8325066858216	5.06848347592344	0.86616176526113	5.85165921563785	4.86693064006554e-09	1.29200785391606e-06
SEC14L5	32.0044240880254	5.06897207811914	1.01779104545604	4.98036615742469	6.34640817904862e-07	5.4152994362082e-05
SGMS2	17.9333610868473	5.07118632818108	1.18607632377096	4.2755986495523	1.90624367768089e-05	0.000713855391021189
APOD	271.425590165723	5.07433698708184	0.761386094204034	6.6646042339224	2.65379502873802e-11	2.11348236088696e-08
SFRP1	100.627384925877	5.09737860672642	0.751350426474581	6.7842892305843	1.1665940916135e-11	1.16134441820124e-08
KIAA1755	5.77759591154454	5.09847767411108	1.49942691725287	3.40028421221897	0.000673158446183112	0.00972376154546971
CNTN2	120.610473097501	5.10660525345742	0.886933366521749	5.75759740946921	8.53195372335703e-09	1.94776985003485e-06
FOLH1	4.09674319377795	5.12080306750681	1.42055524660822	3.60478980295448	0.000312405672044221	0.00549419882107109
TMEM125	20.4200433482624	5.12139775087605	1.19032443589241	4.30252256985417	1.6886446310224e-05	0.000657086278898815
DBNDD1	5.93102486365363	5.12273742840878	1.22106659070453	4.19529734693098	2.72513845736784e-05	0.000932793811223962
DPF1	4.13621093343467	5.12340874529231	1.46721909210425	3.49191799156897	0.000479565462800165	0.00755246731718598
CD109	18.4024923457791	5.12412798641577	1.19350831801315	4.29333244609971	1.76011154265441e-05	0.000682671834043818
ISG20	15.609415403759	5.13441102336409	1.08889984571701	4.71522798314222	2.41440253689608e-06	0.000142784419335449
KITLG	8.3112828994939	5.15120010322636	1.19172014895046	4.32249140686511	1.54277093992096e-05	0.000624743784687992
TMEM139	5.94228779115684	5.15520845906236	1.43136405921878	3.60160535389998	0.000316258209026308	0.00553961959681566
PALM2	11.9151405896236	5.15573862435495	1.3378613362344	3.85371673783958	0.000116338183582148	0.0027038442433314
AK5	16.5361988158781	5.15803785829995	1.16530341927166	4.42634748426622	9.5842090365632e-06	0.000424048004262163
PIFO	34.2554349882334	5.15997860095643	1.13853291193792	4.53212950354988	5.83920318845007e-06	0.000284714780772345
CYB5R2	8.39485346006903	5.16102157920438	1.08160478940938	4.77163343740608	1.82737853543056e-06	0.00011369720825132
ITGB8	60.1838999632458	5.16791069577788	0.863470569975993	5.98504555392266	2.16329307387537e-09	7.17852751680978e-07
C10orf90	11.5312636353873	5.16881489138525	1.26986263111849	4.07037325512332	4.6937872634201e-05	0.00139482543902529
KCTD4	5.96217210003066	5.17170886655751	1.22172660783274	4.2331147029136	2.30476879416983e-05	0.000816996083535693
DNAH17	15.7450619756408	5.17364205744024	1.04276127374449	4.9614827359881	6.99570890679661e-07	5.64667152706705e-05
GLT25D2	15.7109697087757	5.17958924809834	1.08089240343453	4.7919563794141	1.65162817491158e-06	0.000104948671156881
SOX2-OT	66.0602051584137	5.18428914099451	0.809431154437415	6.40485495594469	1.50512397899569e-10	8.17282320594657e-08
GFPT2	28.2112875458526	5.18429464516249	1.08078109003548	4.79680362004879	1.61217515715232e-06	0.000103543249609364
KIF1A	98.7541012235779	5.19175771148565	0.729408804431673	7.11776123340171	1.09694180636571e-12	1.88327933545477e-09
MCAM	8.69469647531492	5.19615410109019	1.03560744176082	5.01749397653545	5.23498423457584e-07	4.70203922302579e-05
NKX6-2	20.9226193645721	5.20153792177824	1.00974489770888	5.15133865353576	2.58633677351621e-07	2.80337057584094e-05
BMP7	20.2692917826366	5.20253508609775	1.09552271513412	4.74890663080484	2.04519330875507e-06	0.000124998579455783
TYRO3	12.4045140686598	5.20448636114693	1.12769542440995	4.61515250349633	3.92806769514899e-06	0.000204020420374999
SPATA17	16.0106720108619	5.20865808612893	1.40935244542308	3.69578106813822	0.000219211815429593	0.00426819013123834
WDR63	30.3869916648021	5.21519229610805	1.23684437061549	4.21653072933728	2.48089493988037e-05	0.00086153403929683
MAL	70.8711244540591	5.23104313078201	0.917164334418117	5.70349601971905	1.17374780305464e-08	2.44527486963487e-06
FGFR3	4.49399525624008	5.23317895218784	1.34380934000201	3.89428678340635	9.84880765248786e-05	0.0023799276089449
FAT1	8.71576613963948	5.23447807434129	1.15603372919951	4.52796310533765	5.95549765613784e-06	0.000287924795899948
ERBB4	12.1161568072182	5.23604996135934	1.24901898357369	4.19213000780659	2.76347546492406e-05	0.000940526436010908
SGCE	6.28217776705765	5.24176157167749	1.28861143819067	4.06775961808737	4.74673103619165e-05	0.00140357546926598
ABCA8	14.3498945856057	5.25805682461391	1.3995219873961	3.75703766855201	0.000171936623773603	0.00359849794224404
ZBTB7C	13.4460023148488	5.26483120091006	1.45196133511729	3.62601336108221	0.000287830468146425	0.00520973147345029
C1orf114	39.9900149039607	5.26537552345854	1.12982373223858	4.66035132137468	3.15670113441711e-06	0.000169102922653573
CCDC164	30.8694713775344	5.27365791456444	1.25321055620946	4.20811801212039	2.57506381370437e-05	0.000886504677766927
KLHL4	8.91037402094428	5.27894665446123	1.12877081665949	4.67672141815633	2.91497829622103e-06	0.000161214034957669
ZNF521	8.60086760017823	5.28724461872046	1.49870294007386	3.52788032727813	0.000418901496528134	0.00681770746256825
HHATL	58.6771160356923	5.31226297481808	1.01826613824872	5.21696909606996	1.81874589827949e-07	2.21701413273947e-05
ART3	8.88423365751694	5.33567324634694	1.51605295314854	3.51945044878929	0.000432441807081559	0.00696219653287912
KCNK1	15.5764926008008	5.34075186969584	1.05284711171272	5.07267561479819	3.9226084795704e-07	3.86673386894565e-05
FLNC	6.98768997319246	5.34151072335377	1.41727560017605	3.76885816893358	0.000163996035489388	0.00346130148402161
AMOTL2	146.011601085805	5.34598095300407	0.663979995044383	8.0514187067439	8.18397671878238e-16	9.77657858825744e-12
APLP1	512.648676286405	5.35237363383468	0.755939787339261	7.08042323406978	1.4371485868471e-12	2.14602212730943e-09
PHLDB1	42.1435209321175	5.37732374015192	0.83300822199407	6.45530692035618	1.0799979584126e-10	6.79034505852469e-08
NDRG4	53.6537361749182	5.38480131588133	1.03501405732092	5.20263592343821	1.96481555102814e-07	2.30114574241002e-05
NWD1	5.05463618546858	5.40119559750643	1.56201445043711	3.45783971204298	0.000544525250705252	0.00827595247445921
SEPTIN4	92.8361728594714	5.40993738249523	0.698479715398093	7.74530349734192	9.53538112280023e-15	5.69548314464858e-11
SPOCK3	26.1070549667478	5.41713888952727	1.12137067471883	4.83081911419306	1.35972494037146e-06	9.28187093581572e-05
ITGA1	5.26712059846325	5.43489304946341	1.49262433333716	3.64116605101316	0.000271406008600243	0.00498036279376113
MYRF	152.438868365689	5.44277095490302	0.808767295914906	6.72971197326416	1.69999262378087e-11	1.45057942026331e-08
PTPRK	34.2762068769396	5.45891789869664	0.898830892781971	6.07335366700708	1.25266149898028e-09	4.88609847705502e-07
JAKMIP2	21.0825174509761	5.46681856457657	1.12808625955892	4.84609977140761	1.25912213601772e-06	8.6944930848946e-05
PTGDS	193.659960318467	5.46927366801854	0.805952296386046	6.78610097960288	1.15204531060852e-11	1.16134441820124e-08
GREM1	14.5018267282712	5.46995226017254	1.22311217894913	4.47215909898975	7.74337810877398e-06	0.000359931497616397
UCHL1	120.087101946519	5.48180495866647	0.75774174588656	7.23439745589409	4.67600493948486e-13	1.11719110014172e-09
DNALI1	66.1247635046684	5.48834987515806	0.997485180475729	5.5021868821555	3.75109028824689e-08	6.13842802512293e-06
NRXN1	7.55110453562121	5.49233661168534	1.33645514650828	4.10963033517064	3.96292994715101e-05	0.00124255016138231
SERP2	5.36706707888404	5.49918914155453	1.40054443519655	3.92646531117222	8.62033178010245e-05	0.00215604739980575
FGFR2	23.7479340097272	5.50384229965483	1.07735318480024	5.10867037597827	3.2443377625966e-07	3.34110852689474e-05
PARD3	28.873782354948	5.51046342435614	1.21719311046214	4.52718913456875	5.97734382916349e-06	0.000287924795899948
CARNS1	76.1121806272405	5.52955909021146	0.951385353437652	5.81211290486177	6.16892094472863e-09	1.60204194795061e-06
PLLP	66.6353271965773	5.53738028728601	0.862116815402334	6.42300461881353	1.33610436750091e-10	7.6005251305552e-08
TMEFF2	5.52669397064778	5.54506047461109	1.15678434426238	4.79351272526679	1.63886058592223e-06	0.000104694270371267
FAM222A	14.7485641231682	5.54706994768462	0.99091606611699	5.59792109277368	2.16937443841161e-08	3.97364820541428e-06
C9orf171	5.66045545169992	5.55949888631236	1.46072763708024	3.80597911971111	0.000141244299236562	0.00310166249757347
CYP7B1	5.62926484287714	5.56031967930139	1.41312735054844	3.93476191451776	8.3279208629779e-05	0.00210774030993928
TMEM229A	5.66218173758387	5.57837694983067	1.30240778912201	4.2831262193166	1.84285559873097e-05	0.000701463938687705
APC2	7.97861008830029	5.58097620091583	1.26412166476369	4.41490432169685	1.0105467535537e-05	0.000440583632042062
PPIL6	14.7036456411388	5.58467538206142	1.14745248243899	4.86702104665004	1.13292968010401e-06	8.05593926102528e-05
C1orf192	18.1176409354516	5.59227028499723	1.37059172967853	4.08018680100229	4.49995236611299e-05	0.00135406627117345
KIF19	5.76203089932126	5.59816511749633	1.57639605468235	3.55124278627073	0.000383416552490174	0.00642397494536833
GPC4	22.8363966143796	5.61037256171882	1.3854730145156	4.04942752615097	5.1343074560555e-05	0.00148869992403007
TF	238.477946371083	5.61336424462331	0.90261772826812	6.21898293023099	5.00387733836926e-10	2.39105274736637e-07
HYDIN	47.9687883553608	5.61432723236823	1.13123541188616	4.96300520066573	6.94107227884845e-07	5.64266531562299e-05
AZGP1	8.12085060708716	5.61550139331425	1.23754226652704	4.53762392218994	5.68915999647807e-06	0.000278535677532488
OPALIN	60.8473105642615	5.61795676247522	0.931487304986465	6.03116836096531	1.6277849137159e-09	5.71927017036768e-07
IQCD	12.0263758521689	5.62892562734745	1.27107110702982	4.42848995324963	9.48951382808617e-06	0.000421419078774414
ABTB2	46.1802853518214	5.63323083043984	1.0066794045008	5.5958538589883	2.19538574884767e-08	3.97364820541428e-06
CCDC88C	12.024800624106	5.64443788151583	1.3254254699793	4.25858564616537	2.05724398760175e-05	0.000751554638406439
GPRC5A	12.3159724964744	5.64474666294814	1.44926635804439	3.89489939624697	9.82394953043605e-05	0.0023799276089449
IFNG	6.0882667311864	5.65117760425446	1.51726658377402	3.72457791181153	0.000195642284688052	0.00396125886929401
GZMB	8.84023859308533	5.66426360464968	1.25840609525015	4.50114126594702	6.75895638215219e-06	0.000317883830477126
LINC00461	20.910892201214	5.67227425221678	1.12046664579272	5.06242133446435	4.1396489564878e-07	4.02050784017913e-05
LARP6	49.4602913440054	5.68179755049846	0.832882056270918	6.82185131462395	8.9874662682594e-12	1.07364272040627e-08
C1orf158	8.69065537762858	5.69183126362352	1.41443376787146	4.02410589517316	5.71921803081348e-05	0.00159979716974694
FIGN	6.32870678330713	5.73434736984742	1.33991643743197	4.27963058714144	1.87203773233838e-05	0.000705468856483101
TMEM235	23.6238047986393	5.73706772472262	1.32987706649615	4.31398350212787	1.60338917031909e-05	0.000639733115310246
EFS	12.6619369984841	5.73861977689328	1.16943818939992	4.90715954798599	9.24048622672435e-07	7.03100945633434e-05
SOD3	6.43317842004948	5.75013909298439	1.44922133579071	3.96774388492359	7.25562464870669e-05	0.00190548910009149
CXorf30	6.48442670448593	5.75682412741806	1.65425723019036	3.48000542017013	0.00050140363856816	0.00778903493671683
ANO4	6.42352141515544	5.75880305687458	1.2392093334	4.6471592019681	3.36537438043401e-06	0.000178678943771843
KCNH8	16.3165045324317	5.76862338408109	1.08073922275354	5.33766450095484	9.41514689432617e-08	1.24970383110689e-05
FAM13C	9.2855282215474	5.79664360643477	1.28701660246762	4.50393848480337	6.6705522703717e-06	0.000314966076766246
SOWAHA	6.66509969945986	5.80112519988015	1.5500540471084	3.74253092058439	0.00018217610788001	0.00377825657071979
ACTN2	18.221053941564	5.80499198184426	1.00565120760605	5.7723711142982	7.81637276078909e-09	1.89207475192223e-06
CNDP1	113.47369778388	5.81439799250875	0.862828950287762	6.73876089875008	1.59743018112449e-11	1.45057942026331e-08
OMG	21.1413379750934	5.82749424338056	1.1163947213201	5.21992278545508	1.78997743265552e-07	2.20444024850545e-05
ANKRD18A	9.49574386724199	5.82861279702412	1.44027061513428	4.04688725561529	5.19032246683367e-05	0.00150129763168995
CDH2	16.9635259529141	5.83026681239725	1.32833610156917	4.3891503103092	1.13794399485512e-05	0.000483767934609937
PRR18	6.72161866094963	5.83333124588645	1.31329672203348	4.44174659695658	8.92316075153302e-06	0.00039923624845623
IL13RA2	12.6333562316261	5.83818867657636	1.50704912393819	3.87392061999951	0.000107098310043564	0.00253848494400877
ASPA	9.60756603526537	5.84624472599718	1.21282137536802	4.82036748752321	1.43294013053428e-06	9.72608113600144e-05
SGCD	7.0329281937936	5.88835102385994	1.33835392958064	4.39969644330553	1.08402408407607e-05	0.000465818406775995
PPAP2C	14.077686367897	5.90411466213313	1.08893349384296	5.42192401603599	5.89609456352917e-08	8.6749061055777e-06
LGI3	14.3484293635895	5.91062334287312	1.33016889551952	4.44351342358267	8.85016319202309e-06	0.000397458832676345
VWA3A	30.090544605618	5.91612632635289	1.5536349945466	3.80792550832019	0.000140137470695314	0.003083948860625
FBXL7	7.24990128484751	5.92855729500615	1.43688687882089	4.1259735768978	3.6916965560116e-05	0.00117289912388603
TEKT1	17.133812835046	5.95468137147356	1.40602145804809	4.23512837402932	2.28421174611937e-05	0.000816232561031073
FOXJ1	90.6214915808617	5.96764494421728	1.04790266006046	5.69484664145521	1.23482863082324e-08	2.50021403793466e-06
PPP1R9A	23.3464971333458	5.97405709922601	1.11242814202652	5.37028584007505	7.86119392194046e-08	1.08564572855644e-05
CORO2B	62.8147655023844	5.97609520453529	1.03631590020894	5.76667327340088	8.08515789430678e-09	1.89382933736056e-06
HID1	10.5504134757998	5.98796654809836	1.09787390169783	5.45414782047202	4.9208255561318e-08	7.53643360173724e-06
NOVA1	36.7138008117548	6.01194016923921	0.922443736292193	6.51740581317674	7.15337085566514e-11	5.34088551511098e-08
AK7	14.9873049080548	6.02775407255324	1.40751353860401	4.28255495043525	1.84759484129251e-05	0.000701463938687705
BBOX1	11.251940196894	6.06714765404538	1.48470174678528	4.0864420528784	4.38038825506221e-05	0.00132476248341704
PLCB4	15.0217738963734	6.08931947826666	1.48326718993334	4.1053422603788	4.03716691868426e-05	0.00125921660602094
NID1	11.9004542666728	6.12652070511967	1.61620489325618	3.79068318050721	0.000150233486476271	0.00325714923674325
SMOC1	17.6080621574477	6.20067786825434	1.36630565413147	4.53828017874665	5.67148746258688e-06	0.000278535677532488
SLC6A9	17.0848152948206	6.22602956167492	1.19962564546569	5.18997704426199	2.10320007913197e-07	2.39284077574386e-05
MAG	212.973599992038	6.22975705084142	0.84883229594084	7.33920832257731	2.14860960134545e-13	6.41682257441817e-10
C2orf73	12.6764361530552	6.23933284876687	1.63570073402406	3.81447089860822	0.000136475017386087	0.0030359973141419
PLXNB1	18.2794434876932	6.26827055685984	1.20348045688419	5.20845230265589	1.9042228603884e-07	2.29289568782562e-05
PI16	13.7951341657699	6.36233954793624	1.38284946791413	4.60089091080399	4.20687719301058e-06	0.000216617909257346
BOK	13.8257138481844	6.37458948811804	1.36579891492746	4.66729722688104	3.05187691568519e-06	0.000164223971327817
RHBDF1	14.0072868464147	6.38090179070944	1.36583240694399	4.67180435774438	2.98565275954543e-06	0.000162120944843317
FAM181B	14.8397738920541	6.47052712454543	1.30510173732598	4.95787181909887	7.12695570363754e-07	5.67590752237694e-05
HAPLN2	11.4293517979812	6.58571470437363	1.38404157929225	4.75832142827771	1.95209477393603e-06	0.000120827586370155
MMP19	34.9086634539359	6.62449368424595	1.81583660185772	3.64817719692877	0.000264107466482895	0.00488394395449639
SLC7A11	86.4326796267487	6.66748504119049	1.09179762043492	6.10688731720674	1.01592909981722e-09	4.33438893800589e-07
NFASC	24.25440760689	6.72296432195642	1.13534088480865	5.92153811415811	3.18944364111685e-09	9.52527343419548e-07
VGF	39.4558219410044	6.88812356390566	1.67448636819223	4.11357398587966	3.8958010153022e-05	0.00122471681391579
DPP6	35.5696247249336	7.27481074339951	1.2920289145385	5.63053246064387	1.7965412376578e-08	3.46152929436453e-06
CCR7	134.084107717843	7.33250305204791	1.50754717965859	4.86386306908715	1.15116567218742e-06	8.13717462718989e-05
TTC40	20.87901482954	7.44348105912422	1.75775061198846	4.23466276066532	2.28894950565385e-05	0.000816232561031073
IL11	68.5122112775305	8.67252280041937	1.97244559235506	4.39683752699336	1.09839500471323e-05	0.00047030203320087
OTUD5	50.3428206225846	0.833123921444961	0.217972185109321	3.8221570381887	0.000132289395782975	0.00297054346245004
NHP2L1	339.577061304972	0.876931796502541	0.235118382141002	3.72974579238402	0.000191673050432371	0.00391859174199671
GOLGA7	142.242830737984	0.916305616924349	0.258958347152188	3.53842858128007	0.000402516151947738	0.00664151650713768
PLA2G16	223.254318670622	0.942866251506601	0.268272105079061	3.51458923106721	0.000440434676412153	0.00706232569720749
POLR2F	86.679623339176	0.948609403443053	0.244363030805076	3.88196774412961	0.00010361462365142	0.00247906543185525
TCEB2	150.932130178197	0.965715359024955	0.265844483336217	3.63263268398766	0.000280544236936647	0.0051088131927518
