# Supplementary material for: Transcriptome and proteome profiling of neural stem cells from the human subventricular zone in Parkinson’s disease
Source: Acta Neuropathol Commun. 2019 Jun 3;7:4. doi: 10.1186/s40478-019-0736-0 (PMC6545684; doi:10.1186/s40478-019-0736-0)
Supplement: Supplementary file 7 — Table S7. Proteins differentially expressed in CD271+ NSCs and SVZ from PD patients in comparison to control donors. (XLSX 21 kb) [file 40478_2019_736_MOESM7_ESM.xlsx]

## Sheet: Proteomics CD271+NSCs PD vs Cnt
Downregulated proteins	AbsDifference	AveExpr	t	p-value		Upregulated proteins	AbsDifference	AveExpr	t	p-value
RHOG	-0.00024719	0.000205236428571429	-3.39556172414711	0.00490685612758905		CSE1L	0.00428933571428571	0.00294694214285714	3.0079891830835	0.0102761095246249
RPS3	-0.000367702857142857	0.000347958571428571	-3.21829307529608	0.00687928646904442		PGRMC1	0.000275842857142857	0.000206391428571429	2.92257505193419	0.0120932863554583
MDH1	-0.000240082857142857	0.000160314285714286	-2.99336087437147	0.0105668449612676		QKI	0.00019487	0.000121866428571429	2.66595100589421	0.0196858846329546
LPCAT2	-0.00023659	0.000162676428571429	-2.95845441605884	0.0112940498652298		SMC1A	0.000139382857142857	0.000112932857142857	2.31043761128375	0.0382803330708483
IMMT	-0.000145511428571429	0.00011868	-2.76208100053407	0.0164092271327302		ATP5H	0.000185137142857143	0.00020146	2.23727994711288	0.0437958624513837
CAPZA2	-0.000733329999999999	0.000628912142857143	-2.75612962664292	0.0165955402872083
ATP6V1A	-0.00010433	7.72721428571429e-05	-2.60939847903545	0.0219036952279988
TLN1	-0.000104364285714286	8.66521428571429e-05	-2.60900313348127	0.0219200251685275
SERPINB1	-0.000458011428571428	0.0005501	-2.47755458409185	0.0280580736508113
RPS4X	-0.000214262857142857	0.000119277142857143	-2.42156138938838	0.0311498628390614
RAC1;RAC3	-0.00104135142857143	0.00153366714285714	-2.37668524301932	0.0338614384641205		protein expression in CD271 positive NSCs only
HK1	-9.29985714285714e-05	6.94092857142857e-05	-2.34638159090505	0.0358187242678737		differentially expressed proteins were considered significant when: p-value < 0.05
ALDOA	-0.000537724285714285	0.000722259285714286	-2.2718901064306	0.0410987274600207		Shown in the table are the log2FoldChange of differentially expressed proteins in PD
VAT1	-0.000358622857142857	0.000465457142857143	-2.25156644437194	0.042662835282129		negative log2FoldChange mean that these proteins are downregulated in PD and upregulated in Cntr
HSPA9	-0.000461982857142857	0.000671274285714286	-2.24583930918882	0.0431136705232965
HSPA1A	-0.00139967857142857	0.00236465357142857	-2.22525192105314	0.0447717654728955
RAB7A	-0.000797098571428571	0.00119473214285714	-2.20216061768394	0.046703078626407
RAP1A	-0.00051995	0.000585760714285714	-2.17941744943632	0.0486817656649331
RBMX;RBMXL1;RBMXL2	-0.00103545571428571	0.000891776428571429	-2.17577771103587	0.0490056517671814
DDX17	-0.000104344285714286	0.000193325	-2.17336786315937	0.0492212073336022
HIBADH	-7.41014285714285e-05	3.88735714285714e-05	-2.16488120974367	0.0499874287506275

## Sheet: Proteomics SVZ PD vs Cntr
Downregulated proteins	AbsDifference(logFC)	AveExpr	t	p-value		Upregulated proteins	AbsDifference(logFC)	AveExpr	t	p-value
SNCA	-354.147161904762	139.53032	-7.19310338551107	6.21769144273099e-05		CCDC90B	412.584285714286	288.809	5.32061326084005	0.000545153582716229
CYCS	-3224.61285714286	1878.071	-5.47456510099738	0.000448294195956777		DCLK2	278.984619047619	264.8189	3.64246729234101	0.00573283719590902
GPR37L1	-276.873142857143	115.7688	-5.38397070699848	0.00050278513351112		RPA2	251.291428571429	175.904	3.41370019953637	0.00814419095130869
RTN4	-880.606714285715	404.6553	-5.31155307943136	0.000551522686838348		UQCR11	946.368571428571	662.458	3.3965567355154	0.00836344173014957
DBN1	-387.208571428571	174.054	-5.27096804004482	0.000581061059660721		STX8	109.323857142857	97.2167	3.38837582413145	0.00847024116248298
STXBP1	-598.180476190476	320.597	-4.60799001814909	0.00140885813139432		UBE2K	258.245714285714	180.772	3.38296933233852	0.0085416048482803
OPALIN	-3700.57523809524	2497.364	-3.93418892946614	0.00369998357058464		DNM1	217.183857142857	152.0287	3.31508246327122	0.00949323314369264
KCNMA1	-2470.04619047619	1317.211	-3.90491740479663	0.00386415806554585		AP1B1	227.039	267.1183	3.25852713593096	0.0103705049556031
HLA-DRB1;HLA-DRB5;HLA-DRB3	-289.11519047619	155.8327	-3.72763814889672	0.00503890643736843		ATAT1	287.599761904762	241.8965	3.1025397812297	0.0132560358383671
RPL14	-1365.79	762.147	-3.57824489331258	0.00632252210806656		GARS	164.515723809524	125.97814	2.97605346564667	0.016202567276223
SCN3B	-962.733333333334	288.82	-3.42505848071048	0.00800225386555409		LHPP	1119.61142857143	1409.948	2.91284123065026	0.0179208557765769
KIF20B	-104.268095238095	41.63	-3.37496628830724	0.00864840047772656		ME1	128.768571428571	90.138	2.71678135533255	0.0245390682389176
OAT	-481.271476190476	469.3233	-3.35186236822851	0.00896462507510981		MUT	162.07580952381	151.6544	2.69432106933169	0.025442046199444
TUBG1;TUBG2	-248.258428571429	77.8691	-3.27460026264506	0.0101128929415964		UQCRQ	1212.77714285714	2275.224	2.62151672396108	0.0286076725735679
TPPP3	-6085.0380952381	9718.14	-3.18968547477765	0.0115537276754352		LIPE	311.030095238095	321.1124	2.5863681282763	0.0302759236236019
GAPDH	-82820.5238095238	146392.3	-3.15538670888173	0.0121948811178837		PEA15	2430.99885714286	1986.0592	2.57078549311812	0.0310466276123858
SLC16A1	-342.034619047619	203.5191	-3.15274511713624	0.0122457704858173		PROSC	676.579047619048	679.342	2.5637516877297	0.0314009661237598
PTP4A2;PTP4A1	-237.867476190476	80.4261	-3.1028203649599	0.0132501556119855		SH3BGRL2	560.208571428572	679.556	2.55971501199677	0.0316061578054799
PACSIN3	-198.313428571428	99.1386	-3.08276034295776	0.0136774478838167		ECHDC1	531.14380952381	638.734	2.55431301092263	0.0318828668726531
DNAJB6;DNAJB8	-673.991428571429	308.706	-3.04815441558599	0.0144484437780187		ARF6	722.671904761905	833.907	2.55416892961282	0.031890280531883
CYSTM1	-288.218095238095	157.844	-2.99435075640617	0.0157375750558358		SH3GL3	153.697238095238	157.5694	2.50221580654154	0.0346798311728428
PTPRZ1	-314.817619047619	535.911	-2.99174563127727	0.0158029298986728		EFHD1;PP1187	260.820476190476	341.871	2.49016157139088	0.0353613531032965
ABCA2	-141.525	130.0725	-2.95890029039452	0.0166513528474521		TMOD2	1327.88952380952	1543.446	2.48686328043113	0.0355501614845268
PTGES3	-774.717619047619	286.831	-2.95589743943905	0.0167312258053584		CLU	941.119523809524	1884.207	2.47539460367299	0.0362145786364711
CD9	-22660.3476190476	27564.09	-2.93263812170877	0.0173634213789195		MTMR10	139.423428571429	140.4264	2.46738258049875	0.0366861082794192
DNAJB1	-189.675714285714	178.957	-2.91263872274182	0.0179266520552953		CHP1	537.498571428571	376.249	2.41541215615855	0.0398973989991884
RPL38	-801.783333333333	674.505	-2.85412161241378	0.0196849297722401		PDXK	1923.21142857143	2580.708	2.4148185015146	0.0399356579595966
BAG2	-136.693333333333	41.008	-2.85005274995699	0.0198135817949053		PPIL1	315.270952380952	388.903	2.38367198748584	0.0419950634580978
RPL8	-103.633047619048	43.4752	-2.83699200516114	0.0202323969795124		PTPMT1	436.831428571429	534.912	2.35270801076529	0.0441470847608438
CLIC4	-710.570476190476	1388.934	-2.81830043236503	0.0208476033461414		CEND1	348.765714285714	244.136	2.35076781382873	0.0442855189157227
TMLHE	-145.167657142857	82.99364	-2.80657562795715	0.021243246720465		PLCD3	389.619523809524	398.577	2.34151622238222	0.0449515704279074
SHISA4	-2259.24142857143	1800.231	-2.73715219179517	0.0237483051390123		PPP3R1;HZGJ	733.248142857143	757.5927	2.32424950443612	0.0462213258326409
SGTB	-1444.81476190476	656.473	-2.7237346518477	0.0242661831574971		ATAD3A	244.939952380952	273.5423	2.32296411513192	0.0463172588429131
VAMP5	-348.982857142857	247.442	-2.72110220830955	0.0243691293950895		OSTF1	447.447714285714	313.2134	2.28473525033274	0.0492621923631797
FAM63A	-343.826190476191	392.275	-2.69168810102315	0.0255500890833987
AASDHPPT	-161.893333333333	48.568	-2.63741168954699	0.0278840775393527
C1orf95	-2126.38380952381	1038.568	-2.63679286097019	0.0279118991441669
C17orf62	-312.88	117.874	-2.61933711262374	0.0287083668900846		protein expression in SVZ homogenate only
GABARAPL2	-260.627428571429	138.9938	-2.60184298082584	0.0295296584980294		differentially expressed proteins were considered significant when: p-value < 0.05
CAMK4	-93.8349523809524	54.5922	-2.58628402131108	0.030280031233195		Shown in the table are the log2FoldChange of differentially expressed proteins in PD
PSMA7;PSMA8	-383.018904761905	305.8601	-2.55447996936004	0.031874278249169		negative log2FoldChange mean that these proteins are downregulated in PD and upregulated in Cntr
BRK1	-740.998380952381	602.9678	-2.52680646171436	0.0333301369463105
VPS41	-148.352728571429	68.45409	-2.51629662996504	0.0339004052377981
RAB33B;RAB33A	-201.565238095238	130.801	-2.49145380763905	0.03528765437867
MT-ND2	-521.496190476191	436.696	-2.48767239057691	0.0355037511742095
LACTB2	-79.1833333333333	23.755	-2.48162109572685	0.0358523285878369
RPS23	-636.293285714286	478.6147	-2.47558223137083	0.0362036092739302
TNR	-3616.33333333333	5951.2	-2.45908431840446	0.0371809648557519
MT-ATP8	-620.04	479.292	-2.45400330480602	0.0374872560234216
C4orf36	-444.643333333333	574.143	-2.436506520035	0.0385614203935628
CLDN11	-790.160571428572	442.9376	-2.41372111631241	0.0400064769371646
ORM1	-170.788095238095	134.655	-2.407468027437	0.0404124116889846
SLC2A1	-310.363904761905	257.5186	-2.3820367487038	0.0421060599438167
RPL21	-1149.82857142857	1314.22	-2.37776352390657	0.0423974967445346
COPS8	-230.111666666667	234.8485	-2.32968529665684	0.0458178045372352
IVD	-145.726190476191	102.745	-2.28181426588533	0.0494946669875257
